1 **Title: Soil Bacterial and Fungal Response to Wildfires in the Canadian Boreal**  
2 **Forest Across a Burn Severity Gradient**

3

4 Running Title: Soil Microbial Response to Boreal Forest Wildfires

5

6 Thea Whitman<sup>1\*</sup>, Ellen Whitman<sup>2,3</sup>, Jamie Woollet<sup>1</sup>, Mike D. Flannigan<sup>2</sup>, Dan K.  
7 Thompson<sup>3</sup>, and Marc-André Parisien<sup>3</sup>

8

9 1. Department of Soil Science, University of Wisconsin-Madison

10 2. Department of Renewable Resources, University of Alberta

11 3. Northern Forestry Centre, Canadian Forest Service, Natural Resources Canada

12

13 \* Corresponding author: [twhitman@wisc.edu](mailto:twhitman@wisc.edu), (608) 263-2927, 1525 Observatory Dr.,  
14 Madison, WI, 53703, USA

15 **Abstract**

16

17 Global fire regimes are changing, with increases in wildfire frequency and severity  
18 expected for many North American forests over the next 100 years. Fires can result in  
19 dramatic changes to C stocks and can restructure plant and microbial communities, with  
20 long-lasting effects on ecosystem functions. We investigated wildfire effects on soil  
21 microbial communities (bacteria and fungi) in an extreme fire season in the  
22 northwestern Canadian boreal forest, using field surveys, remote sensing, and high-  
23 throughput amplicon sequencing. We found that fire occurrence, along with vegetation  
24 community, moisture regime, pH, total carbon, and soil texture are all significant  
25 predictors of soil microbial community composition. Communities become increasingly  
26 dissimilar with increasingly severe burns, and the burn severity index (an index of the  
27 fractional area of consumed organic soils and exposed mineral soils) best predicted  
28 total bacterial community composition, while burned/unburned was the best predictor for  
29 fungi. Globally abundant taxa were identified as significant positive fire responders,  
30 including the bacteria *Massilia* sp. (64× more abundant with fire) and *Arthrobacter* sp.  
31 (35×), and the fungi *Penicillium* sp. (22×) and *Fusicladium* sp. (12×). Bacterial and  
32 fungal co-occurrence network modules were characterized by fire responsiveness as  
33 well as pH and moisture regime. Building on the efforts of previous studies, our results  
34 identify specific fire-responsive microbial taxa and suggest that accounting for burn  
35 severity improves our understanding of their response to fires, with potentially important  
36 implications for ecosystem function.

37

## 38 Introduction

39

40 The boreal forests of Canada hold roughly 10% (between 168–200 Pg) of total global  
41 terrestrial carbon (C) stocks [1] and cover about 55% of the country's landmass [2].  
42 Wildfire is a natural part of these ecosystems, playing a key role in structuring  
43 vegetation communities and affecting above- and belowground C stocks through  
44 combustion and persistent effects on the subsequent forest recovery [3-6]. Much of this  
45 soil C is stored in peatlands (peat-forming wetlands), which cover as much as 50% of  
46 the land surface in some boreal forest landscapes [7], and act as substantial sources of  
47 methane [8]. Because soil microbes play an important role in these ecosystems, both  
48 governing soil C cycling and also interacting directly with plants, it is important to  
49 understand how soil microbes are affected by wildfire.

50

51 Microbial response to fire has been studied for over a century [9-10]. Across studies,  
52 wildfires usually decrease soil microbial biomass [11-13], and microbial communities  
53 can take decades to recover to pre-fire states [13-15]. There are numerous mechanisms  
54 through which fires can affect soil microorganisms. Briefly, we can organize these  
55 mechanisms into three categories: (1) fire directly killing microbes and destroying  
56 microbial habitat; (2) altered post-fire chemico-physical environment (e.g., increased pH,  
57 changes to water permeability, changed nutrient inputs or competition for nutrients from  
58 plants); (3) altered post-fire biological environment (e.g., competitors removed,  
59 differential survival of taxa, or loss of symbiont plants) [16-17]. Investigating specific fire-  
60 responsive taxa and beginning to decipher their ecological strategies may help us  
61 predict the long-term ecological and biogeochemical effects of fire.

62

63 Although numerous field studies have investigated how microbes are affected by fires,  
64 few consider multiple ecosystem types, more than one fire, or how these effects change  
65 with increasing burn severity. Wildfires can range from lightly burned surface fires with  
66 no tree mortality, to fires that kill all trees and remove all or most of the soil litter layer (O  
67 horizon). As fire regimes around the world are affected by climate change [4, 18], fire  
68 frequency, size, and intensity (and thus, indirectly, burn severity) are expected to

69 increase in many areas of the boreal forest [18-19]. Burn severity is the degree of fire-  
70 induced change to vegetation and soils [20, 21]. When past studies have considered  
71 burn severity, some have observed that increasing burn severity is associated with  
72 reduced fungal abundance [22] or changes to community composition [23]. For bacteria,  
73 while some studies have found only negligible effects of burn severity on community  
74 composition [24] others have noted distinct changes to bacterial community composition  
75 with different levels of burn severity [25]. These changes to microbial communities could  
76 have interesting interactive effects with plant colonization post-fire. For example,  
77 Knelman *et al.* [26] reported interactive effects between burn severity (low vs. high) and  
78 the effect of plant colonization (*Corydalis aurea* presence vs. absence) on bacterial  
79 communities and potential activity in a Colorado, USA *Pinus ponderosa* forest.

80

81 There are numerous metrics of burn severity used by fire scientists, each of which  
82 represents different aspects of the effects of fire. Field-based ground metrics include  
83 single measurements such as percent exposed mineral soil or mean duff depth (O  
84 horizon); the burn severity index (BSI) integrates the burn severity of the forest floor and  
85 soil surface [27]. Canopy fire severity index (CFSI) estimates the intensity of the  
86 combustion of large trees [28]. Composite burn index (CBI) is a generalized measure of  
87 burn severity, mortality, and combustion across all forest strata from soils to large trees  
88 [29-30]. The remotely-sensed relativized burn ratio (RBR [21]) combines satellite  
89 imagery from before and after burns, capturing changes in reflectance due to vegetation  
90 combustion and mortality, and combustion of organic soil and changes in soil moisture.  
91 Few studies have investigated the relative utility of these different burn severity metrics  
92 for predicting microbial community response to fire. Determining the effects of fire on  
93 soil microbial communities across a wide range of sites and assessing the utility of  
94 different burn severity metrics could underpin efforts to predict and characterize the  
95 effects of wildfires and changing wildfire regimes on soil microbes in boreal upland and  
96 wetland soils.

97

98 The first objective of our study was to determine the relative importance of soil,  
99 vegetation, and wildfire severity metrics in predicting soil microbial community

100 composition one year post-fire across five vegetation types in the boreal forests of  
101 northwestern Canada. Our studied regions have high pedodiversity, spanning wide  
102 ranges of pH, texture, and organic horizon thicknesses. We hypothesized that  
103 vegetation community and soil pH would be the strongest predictors of microbial  
104 community composition, while the effect of fire might not be a significant factor after  
105 controlling for vegetation community and soil properties across such a wide range of  
106 sites. If fire were to be found to be a significant predictor, we hypothesized that burn  
107 metrics associated with the ground surface would outperform remotely sensed metrics  
108 or canopy burn metrics as predictors of microbial community composition. The second  
109 objective of our study was to identify specific fire-responsive taxa. To achieve these  
110 objectives, we sampled six large wildfires one year after they burned in the Northwest  
111 Territories and northern Alberta, Canada, characterizing soil, vegetation, and fire  
112 properties, and sequencing microbial (bacterial/archaeal and fungal) communities using  
113 the ribosomal RNA gene.

114

## 115 **Methods**

116

### 117 *Study region*

118

119 We selected sites in the Northwest Territories and northern Alberta (Wood Buffalo  
120 National Park), Canada, and sampled them one year post-fire, in 2015 (Figure 1;  
121 Supplemental Table 1; Supplemental Note 1). The fires and the drivers of burn severity  
122 are described in detail in Whitman *et al.* [31], while their effects on understory  
123 vegetation are described in detail in Whitman *et al.* [32]. The study region has long, cold  
124 winters and short, hot summers, with mean annual temperatures between  $-4.3$  °C and  
125  $-1.8$  °C and annual precipitation ranging from 300 to 360 mm [33-34]. The fire regime of  
126 the study region includes infrequent stand-replacing fires every 40-350 years on  
127 average [35]. The majority (~97%) of the burned area is contributed by ~3% of fires [36].  
128 The six large wildfires in this study ranged in size from 14 000 to 700 000 ha. The soils  
129 in these regions are mostly classified as Typic Mesisols (32 sites), Orthic Gleysols (16  
130 sites), or Orthic Gray Luvisols (8 sites) (Soil Landscapes of Canada map v.3.2). The

131 sampled sites span a wide range of soil properties, with pH values ranging from 3.2  
132 (wetlands) to 8.1 (uplands with calcareous plant material), total C ranging from 0.5%  
133 (mineral horizon) to 52% (organic horizon), and a wide range of textures (Supplemental  
134 Table 2). We classified vegetation communities for each upland site as being jack pine-  
135 dominated (*Pinus banksiana* Lamb.), black spruce-dominated (*Picea mariana* (Mill.)), or  
136 composed of a mix of coniferous and broadleaf trees (“mixedwood”). We classified  
137 vegetation communities for wetlands as open or treed [37].

138

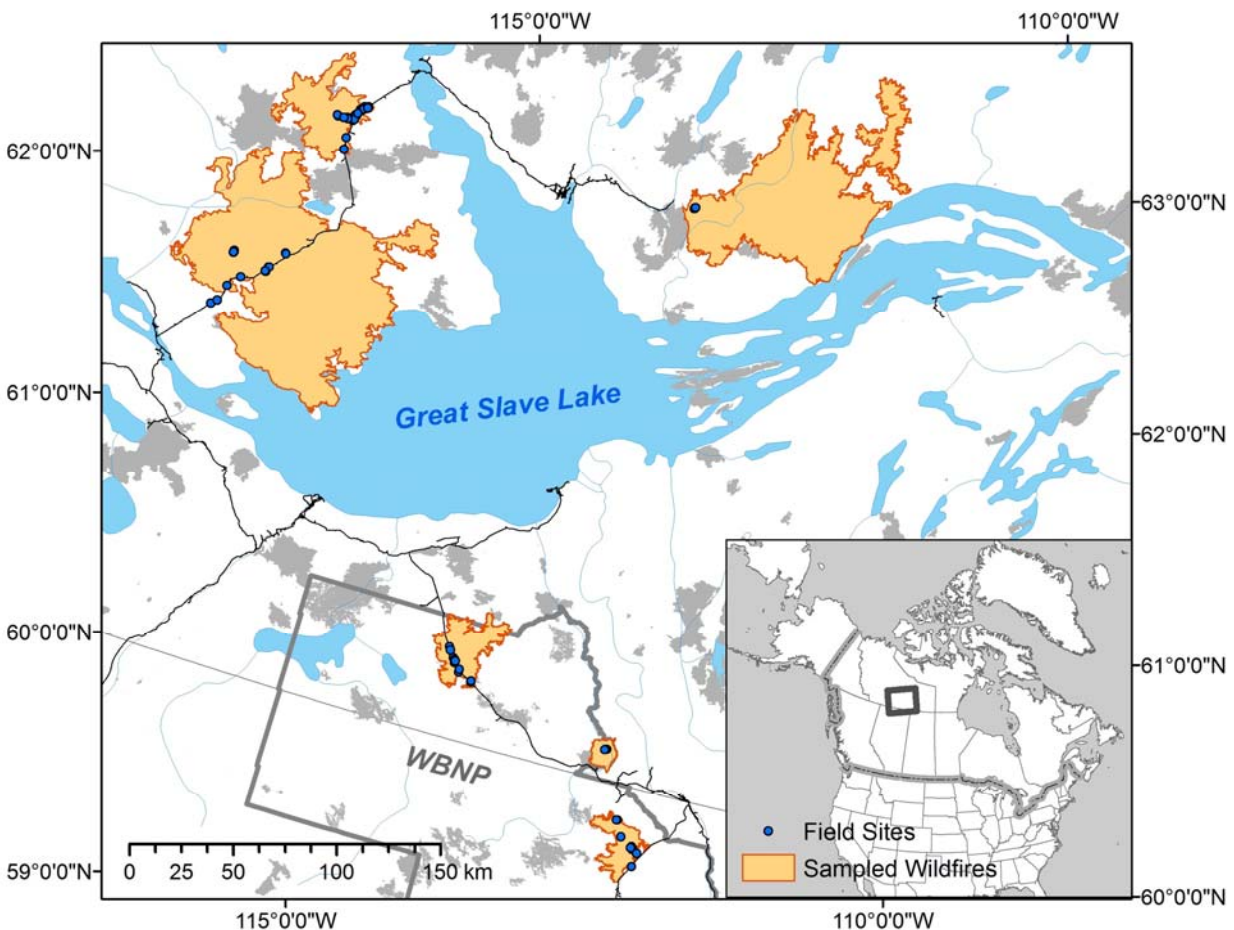

139

140 **Figure 1.** Study region of northern Alberta and the Northwest Territories, Canada,  
141 including Wood Buffalo National Park (WBNP – grey outline). Blue points indicate  
142 sampled sites, orange shapes indicate sampled fires, and grey shapes indicate other  
143 2014 fires in the region. Inset indicates relative location within North America.

144

145 *Site assessment methodologies*

146

147 Sites were selected and characterized as described in detail by Whitman *et al.* [31-32].

148 Briefly, field sites were selected to represent the local range of burn severity and

149 vegetation communities, resulting in a total of 50 burned field sites. We selected an

150 additional 12 control sites (not burned within the last 38 years before sampling, mean

151 time since fire 95 years; “unburned”), chosen to reflect the range of vegetation

152 communities sampled in the burned plots, for a total of 62 sites. At each site we

153 established a 30 × 30 m square plot with 10 × 10 m subplots at the four corners. We

154 measured post-fire organic horizon depth (up to 10 cm) at the inner corners of the 10 ×

155 10 m subplots. Understory vegetation percent cover was assessed in five 1 × 1 m plots

156 at the same four points as organic soil depth, and at the plot centre [32]. We assessed

157 burn severity in the four subplots (described in detail in [31]; Supplemental Table 1),

158 using severity metrics of canopy fire severity index (CFSI [28]), burn severity index (BSI

159 [27]), and percent exposed mineral soil. We also assessed the composite burn index

160 (CBI; understory, overstory, and mean [29-30]) in the entire 30 × 30 m plot area. We

161 used the relativized burn ratio (RBR) to represent remotely sensed burned severity at

162 each site [21]. RBR was produced using multispectral Landsat 8 Operational Land

163 Imager and Landsat 5 Thematic Mapper images (Landsat Level-1 imagery, courtesy of

164 the USGS).

165

166 At each plot, we took soil cores (5.5 cm diameter, 13.5 cm depth) at three locations

167 (centre, SW and NE subplots). Soil cores were gently extruded and separated into

168 organic (O) horizons (where present) and mineral (M) horizons (where present in the

169 top 13.5 cm of soil profile). The three samples were pooled by horizon at each site and

170 mixed gently by hand in a bag. From these site-level samples, sub-samples were

171 collected for microbial community analysis and stored in LifeGuard Soil Preservation

172 solution (QIAGEN, Germantown, MD) in a 5 mL tube (Eppendorf, Hamburg, Germany).

173 Tubes were kept as cold as possible while in the field (usually for less than 8 h, but up

174 to 2 days for remote sites) and then stored frozen. The remaining soil samples were air-

175 dried and analyzed for a range of properties, including, pH and total C (Supplemental  
176 Table 2; Supplemental Note 1).

177

### 178 *DNA extraction, amplification, and sequencing*

179

180 Duplicate DNA extractions were performed for each sample, with two blank extractions  
181 for every 24 samples (half of which were posted sequenced), using a DNEasy PowerLyzer  
182 PowerSoil DNA extraction kit (QIAGEN, Germantown, MD) following manufacturer's  
183 instructions. Extracted DNA was amplified in triplicate PCR, targeting the 16S rRNA  
184 gene v4 region (henceforth, "16S") with 515f and 806r primers [38], and targeting the  
185 ITS2 gene region with 5.8S-Fun and ITS4-Fun primers [39] with barcodes and Illumina  
186 sequencing adapters added as per [40] (all primers in Supplemental Tables 3-5). The  
187 PCR amplicon triplicates were pooled, purified and normalized using a SequalPrep  
188 Normalization Plate (96) Kit (ThermoFisher Scientific, Waltham, MA). Samples,  
189 including blanks, were pooled and library cleanup was performed using a Wizard SV  
190 Gel and PCR Clean-Up System A9282 (Promega, Madison, WI). The pooled library was  
191 submitted to the UW Madison Biotechnology Center (UW-Madison, WI) for 2x250 paired  
192 end (PE) Illumina MiSeq sequencing for the 16S amplicons and 2x300 PE for the ITS2  
193 amplicons. (See Supplemental Note 1 for full details.)

194

### 195 *Sequence data processing and taxonomic assignments*

196

197 For 16S reads, we quality-filtered and trimmed, dereplicated, learned errors, determined  
198 operational taxonomic units (OTUs), and removed chimeras using dada2 [41] as  
199 implemented in R. For ITS2 reads, we first merged reads using PEAR [42], and then  
200 performed the same steps as for 16S. These sequence processing steps were  
201 performed on the UW-Madison Centre for High Throughput Computing cluster  
202 (Madison, WI). After confirming that the paired DNA extraction replicates were very  
203 similar to each other, we combined the community composition data from paired  
204 extractions additively and proceeded with a single sequencing dataset for each soil  
205 sample. Taxonomy was assigned to the 16S reads using a QIIME2 [43] scikit-learn



206 feature classifier trained on the 515f-806r region of the 99% ID OTUs from the Silva 119  
207 database [44]. We used BLAST to determine the closest > 97% ID match, if present, in  
208 the database of globally abundant bacterial phylotypes [45]. For the ITS2 reads, we first  
209 ran them through ITSx [46] to identify fungi and to remove plant sequences, and then  
210 assigned taxonomy using the UNITE species hypothesis 99% threshold database  
211 version 7.2 [47], using the `parallel_assign_taxonomy_uclust.py` script in QIIME1 [43]  
212 with default settings to the genus level. We also classified ITS2 taxonomic assignments  
213 using the FunGuild database [48]. (See Supplemental Note 1 for full details of  
214 bioinformatics, including sequences retained at each step.)

215

### 216 *Quantitative PCR*

217

218 To estimate the relative abundance of bacteria vs. fungi in a given sample, extracted  
219 DNA was amplified via quantitative PCR (qPCR) in triplicate, targeting the 16S rRNA  
220 gene v4 region with 515f and 806r primers [49] and targeting the 18S gene region with  
221 FR1 and FF390 primers [50] (Supplemental Note 1; qPCR primers in Supplemental  
222 Table 3; raw C<sub>q</sub> values and calibration curves in Supplemental File 1).

223

### 224 *Bioinformatics and statistics*

225

226 We worked primarily in Jupyter notebooks, with phyloseq [51], ggplot [52], and dplyr [53]  
227 being instrumental in working with the data in R [54] (See Supplemental Note 1 for full  
228 bioinformatics details).

229

230 We compared community composition across samples using Bray-Curtis dissimilarities  
231 on Hellinger-transformed relative abundances [55], which we represented using NMDS  
232 ordinations. We tested for significant effects of vegetation community, moisture regime  
233 (as a continuous variable), pH, total C, texture (% sand), and burned/unburned using a  
234 permutational multivariate ANOVA (PERMANOVA; the `adonis` function in `vegan` [56]).  
235 Because the order of the terms in the PERMANOVA model affects the partial R<sup>2</sup> of a  
236 given term, to compare the relative explanatory power of each component, we also

237 compared the  $R^2$  of single-component models for each factor. We predicted 16S rRNA  
238 gene copy numbers using the ribosomal RNA operon database (rrnDB) [57]. We  
239 calculated the abundance-weighted mean predicted copy number for each sample  
240 using the approach of Nemergut *et al.* [58]. We tested for the relationship between  
241 weighted mean predicted copy number for each sample and burn severity (understory  
242 composite burn index) with a linear model. To compare our findings with those of  
243 Holden *et al.* [23], we calculated the mean understory CBI value for all sites at which  
244 each OTU within that phylum was present, and determined whether there were  
245 significant differences in these values between different fungal phyla, using an ANOVA  
246 and Tukey's HSD for multiple comparison correction. We tested whether vegetation  
247 community dissimilarity was significantly correlated with bacterial or fungal community  
248 dissimilarity for all pairs of sites in mineral and in organic soil horizons using Mantel  
249 tests, with 999 permutations.

250  
251 To examine the relative explanatory power of different burn severity metrics for  
252 predicting microbial community composition, we used a simple linear model, which  
253 controlled for parameters we expected to influence community composition – vegetation  
254 community, moisture regime, pH, texture (% sand), and total C – and then tested the  
255 inclusion of each severity metric, comparing the partial  $R^2$  values for the severity metric.  
256 The severity metrics we tested included: Burned/Unburned, RBR, CFSI, CBI,  
257 Understory CBI, Overstory CBI, BSI, % exposed mineral soil, and mean duff depth. To  
258 determine whether communities become increasingly dissimilar with increasing burn  
259 severity, we fit a linear model to Bray-Curtis dissimilarity (to unburned samples from  
260 sites with the same vegetation community and soil horizon) vs. BSI. We calculated the  
261 relationship between BSI and  $\log(16S \text{ abundance} : 18S \text{ abundance})$  using a linear  
262 model in R. We also did the same with pH and  $\log(16S \text{ abundance} : 18S \text{ abundance})$ .

263  
264 We estimated richness and its associated standard error in each sample using the  
265 *breakaway* function in R [59]. We determined which OTUs were significantly enriched in  
266 burned plots (vs. unburned plots) using metagenomeSeq [60], after controlling for  
267 (including as variables) vegetation community (categorical variable), pH (continuous

268 variable), and %C (continuous variable), resulting in an estimate of the log<sub>2</sub>-fold change  
269 in the abundance of each OTU in burned vs. unburned plots, across samples. For a  
270 small subset of OTUs, we investigated the relationship between their log(relative  
271 abundance) and BSI using a linear model.

272

273 To determine which fungal and bacterial OTUs and understory vegetation co-occurred  
274 across samples, we used a network analysis approach, following Connor *et al.* [61] to  
275 avoid false positives and establish conservative network cutoff parameters. After  
276 simulating a null model network to choose an appropriate rho value, we determined a  
277 consensus network by adding random tie-breaking noise to the matrix 2000 times,  
278 selecting only the co-occurrences that occurred in 95% of the 2000 replications. We  
279 determined standard network characterization metrics [62-66], including modularity  
280 using random walks, and plotted the network using igraph R package [67].

281

## 282 **Results**

283

### 284 *Community-level characteristics and predictors*

285

286 Bacterial and fungal communities were dominated by typical soil organisms [45, 68]  
287 (Supplemental Figures 1-4). All tested factors (vegetation community, moisture regime,  
288 pH, total C, texture, and burned/unburned) were significant predictors of community  
289 composition for both bacteria (Figure 2 and Supplemental Figure 5) and fungi (Figure 2  
290 and Supplemental Figure 6) in the combined model (PERMANOVA,  $p < 0.015$  for all  
291 factors). Moisture regime and vegetation community provided the most explanatory  
292 power for bacteria and for fungi ( $R^2$  values between 0.12 and 0.15 for the individual  
293 models). After these factors, for bacteria, pH provided the most explanatory power ( $R^2_{\text{pH}}$   
294 = 0.07; Figure 2A). For fungi, carbon provided the most explanatory power ( $R^2_{\text{C}}$  = 0.05;  
295 Figure 2B).

296

297

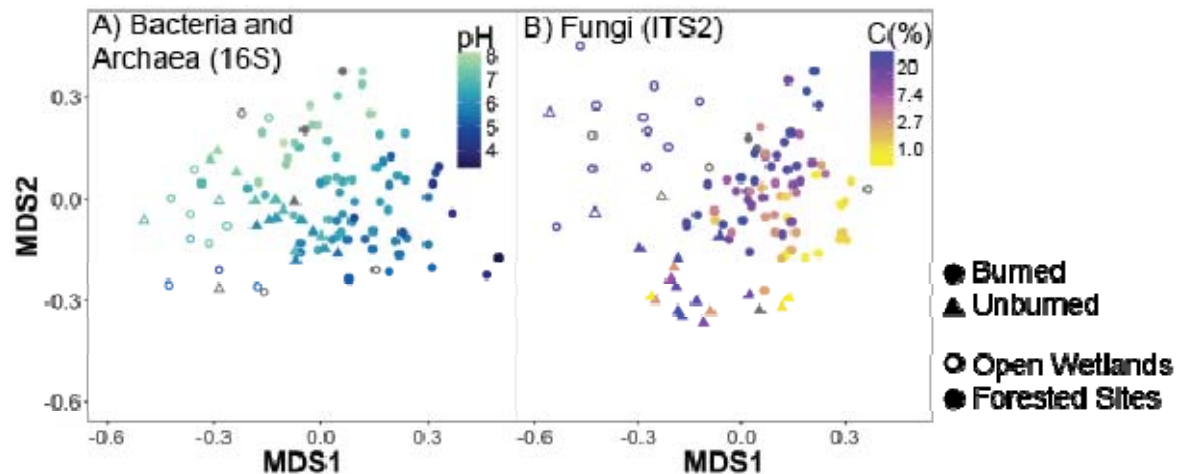

298  
299 **Figure 2.** (A) NMDS ordination of Bray-Curtis distances between bacterial/archaeal  
300 (16S rRNA gene v4 region) communities for all samples (k=2, stress=0.16). Circles  
301 indicate burned plots, while triangles indicate unburned plots, and open points indicate  
302 open wetland sites. Points are shaded by pH, with darker colours indicating lower pH  
303 values. Grey points indicate samples for which pH values were not attainable, due to  
304 insufficient sample mass. (B) NMDS ordination of Bray-Curtis distances between fungal  
305 (ITS2) communities for all samples (k=3, stress=0.14). Circles indicate samples from  
306 burned plots, whereas triangles indicate unburned plots, and open points indicate open  
307 wetland sites. Points are shaded by C content, with darker colours indicating higher C.  
308 Note logged colour scale. Grey points indicate samples for which C values were not  
309 attainable, due to insufficient sample mass.

310

311

312 Different fungal phyla were present at different levels of burn severity. OTUs within  
313 *Chytridiomycota* and *Mucoromycota* occurred at sites with significantly higher mean BSI  
314 than *Ascomycota*, *Basidiomycota*, or *Rozellomycota* in upland sites (Supplemental  
315 Figure 7A). In wetland sites, OTUs within *Basidiomycota* occurred at sites with  
316 significantly lower mean BSI than for all other phyla except *Rozellomycota*. This trend  
317 largely mirrored that of the same approach with moisture regime instead of BSI  
318 (Supplemental Figure 7B), but after controlling for moisture regime, similar trends  
319 persisted (Supplemental Figure 8).

320

321 There was a significant positive relationship between burn severity and weighted mean  
322 predicted 16S copy number (Figure 3A). The OTUs identified as positive fire-responders  
323 had significantly higher mean predicted 16S copy number than those identified as  
324 negative fire-responders (3.6 vs. 2.6,  $p=0.01$ ).

325  
326 Bacterial and fungal communities become increasingly dissimilar from unburned sites  
327 with increasing burn severity in upland sites ( $p<0.001$ , Figure 3B and 3C). We did not  
328 detect such a relationship for wetland sites ( $p>0.05$ ) (Supplemental Figure 9). Across all  
329 sample pairs, there was a significant positive relationship between understory  
330 vegetation community dissimilarity and organic horizon microbial community  
331 dissimilarity in wetlands but not in uplands (Supplemental Figure 10) – *i.e.*, wetland sites  
332 with similar understory plant communities have similar microbial communities.

333  
334 All burn severity metrics added significant (but relatively little) additional predictive  
335 power to the model explaining microbial community composition. For bacteria, burn  
336 severity index was the best predictor of microbial community composition (partial  $R^2_{BSI} =$   
337  $0.040$ ,  $p=0.001$ ), marginally better than burned/unburned (Table 1). For fungi, a simple  
338 burned/unburned metric was the best predictor of microbial community composition  
339 (partial  $R^2_{BU} = 0.045$ ,  $p=0.001$ ), marginally better than burn severity index (Table 1).

340  
341 There was not a significant relationship ( $p>0.05$ ) between BSI (or other measures of  
342 burn severity) and 16S:18S gene copy numbers as determined by qPCR (Supplemental  
343 Figure 11). However, there was a significant ( $p<0.001$ ) but weak positive relationship  
344 between pH and 16S:18S gene copy numbers as determined by qPCR, suggesting an  
345 increasing relative abundance of fungi in more acidic soils (Supplemental Figure 12).

346  
347 There were no significant detectable changes in estimated richness across different  
348 vegetation communities or with increasing burn severity for bacteria (Supplemental  
349 Figure 13) or fungi (Supplemental Figure 14).

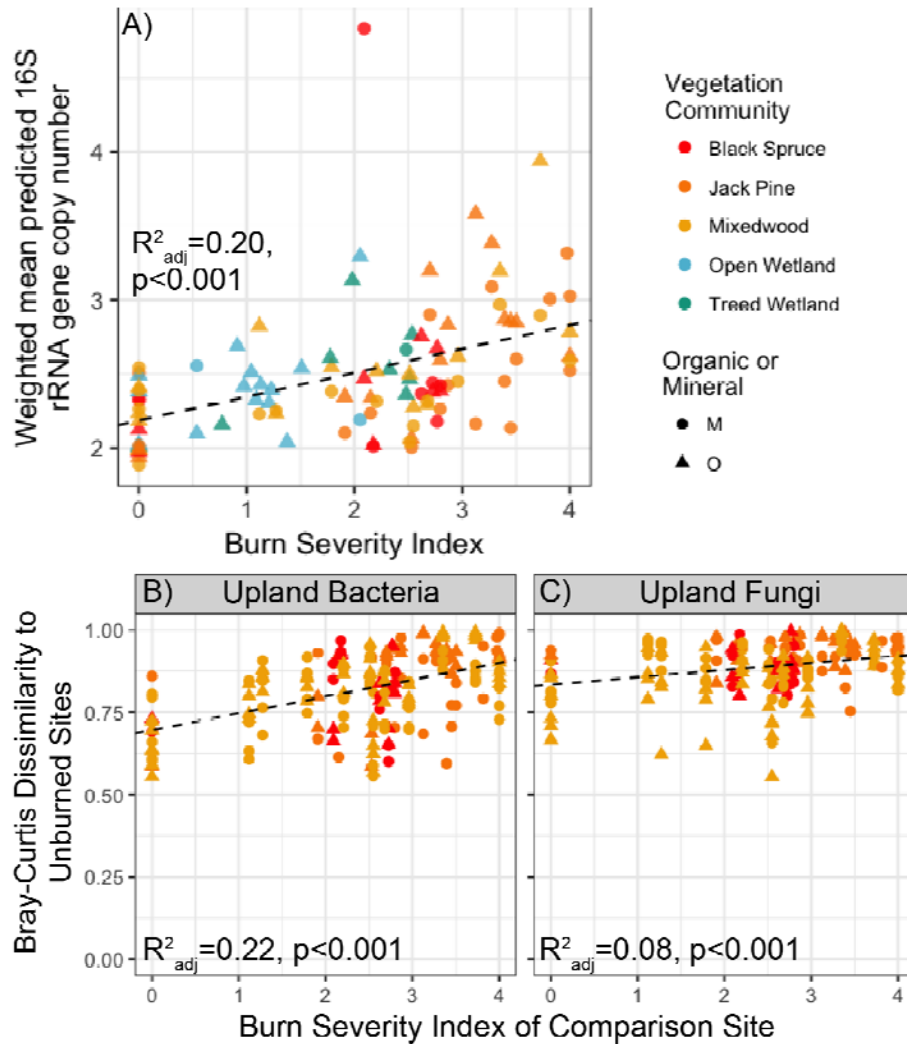

350

351 **Figure 3.** (A) Relationship between weighted mean predicted 16S rRNA gene copy

352 number and burn severity index (BSI). Dashed line indicates linear fit ( $y = 2.19 + 0.16x$ ,

353  $R^2_{adj} = 0.20$ ,  $p < 0.001$ ). (B) Bray-Curtis dissimilarity to unburned sites (within the same

354 vegetation community and the same soil horizon type) for bacteria in uplands vs. burn

355 severity index of comparison sites. Dashed lines indicate linear fit ( $y = 0.05x + 0.70$ ,

356  $p < 0.001$ ,  $R^2_{adj} = 0.22$ ). (C) Bray-Curtis dissimilarity to unburned sites (within the same

357 vegetation community and the same soil horizon type) for fungi in uplands vs. burn

358 severity index of comparison sites. Dashed lines indicate linear regressions ( $y = 0.02x$

359  $+ 0.83$ ,  $p < 0.001$ ,  $R^2_{adj} = 0.08$ ). For all figures, points are coloured by vegetation

360 community; circles represent mineral horizon samples, triangles represent organic

361 horizon samples. Equivalent figures for wetlands for (B) and (C) are found in

362 Supplemental Figure 9.

**Table 1.** Predictive value of burn severity metrics in models of Hellinger-transformed microbial community Bray-Curtis dissimilarities, after controlling for vegetation community, moisture regime, pH, total C, and texture (% sand). The best models for each group are highlighted in bold text.  $N_{\text{bacteria}} = 94$ ,  $N_{\text{fungi}} = 92$ , except for Overstory CBI, where  $N_{\text{bacteria}} = 90$ ,  $N_{\text{fungi}} = 88$

| Severity metric                           | $p_{\text{severity}}$ | Partial $R^2_{\text{severity}}$ | $R^2_{\text{full}}$ |
|-------------------------------------------|-----------------------|---------------------------------|---------------------|
| <i>Bacteria</i> (16S rRNA gene v4 region) |                       |                                 |                     |
| <b>Burned/Unburned</b>                    | <b>0.001</b>          | <b>0.037</b>                    | <b>0.29</b>         |
| Relativised Burn Ratio                    | 0.001                 | 0.028                           | 0.29                |
| Canopy Fire Severity Index                | 0.001                 | 0.020                           | 0.28                |
| Composite Burn Index (CBI)                | 0.001                 | 0.032                           | 0.29                |
| Understory CBI                            | 0.001                 | 0.033                           | 0.29                |
| Overstory CBI                             | 0.001                 | 0.031                           | 0.29                |
| <b>Burn Severity Index</b>                | <b>0.001</b>          | <b>0.039</b>                    | <b>0.30</b>         |
| % exposed mineral soil                    | 0.001                 | 0.026                           | 0.28                |
| Mean duff depth                           | 0.034                 | 0.013                           | 0.27                |
| <i>Fungi</i> (ITS2)                       |                       |                                 |                     |
| <b>Burned/Unburned</b>                    | <b>0.001</b>          | <b>0.044</b>                    | <b>0.28</b>         |
| Relativised Burn Ratio                    | 0.001                 | 0.036                           | 0.27                |
| Canopy Fire Severity Index                | 0.001                 | 0.030                           | 0.27                |
| Composite Burn Index (CBI)                | 0.001                 | 0.040                           | 0.28                |
| Understory CBI                            | 0.001                 | 0.041                           | 0.28                |
| Overstory CBI                             | 0.001                 | 0.039                           | 0.27                |
| <b>Burn Severity Index</b>                | <b>0.001</b>          | <b>0.043</b>                    | <b>0.28</b>         |
| % exposed mineral soil                    | 0.001                 | 0.026                           | 0.26                |
| Mean duff depth                           | 0.001                 | 0.021                           | 0.26                |

363

364 *Specific fire-responsive microbes*

365

366 There were wide ranges of responses to wildfire within individual phyla. Numerous  
367 bacterial OTUs were identified as being significantly enriched (160 OTUs) or depleted  
368 (133 OTUs) in burned vs. unburned sites, after controlling for vegetation community,  
369 total C, and pH (Figure 4A; Supplemental Table 6; Supplemental Figures 15 and 16).  
370 About half of the responsive OTUs were at least 97% ID similar to the globally dominant  
371 phylotypes identified by Delgado-Baquerizo *et al.* [45] (Supplemental Figures 17 and  
372 18). The most abundant bacterial OTU across samples (average 4% in burned samples  
373 vs. average 0.09% in unburned samples) was identified as a positive fire responder and  
374 was classified as an *Arthrobacter sp.* The third most abundant OTU (average 2% of the  
375 community in burned samples and not detected in unburned samples) was also  
376 identified as a positive fire responder and was classified as a *Massilia sp.* Of the

377 bacterial taxa identified as being fire-responsive, different OTUs also showed different  
378 trends with burn severity (Figure 4B): the relative abundance of the *Arthrobacter sp.*  
379 (OTU sq1 and sq7 (we use the arbitrarily numbered “sq#” to distinguish specific OTUs))  
380 increased with increasing burn severity ( $p < 0.05$ ). *Aeromicrobium* (OTU sq8),  
381 *Blastococcus* (OTU sq20), and *Massilia* (OTU sq3) also increased in relative abundance  
382 with increasing burn severity ( $p < 0.05$ ), with the *Massilia* and *Blastococcus* OTUs not  
383 even being detectable at any unburned sites.

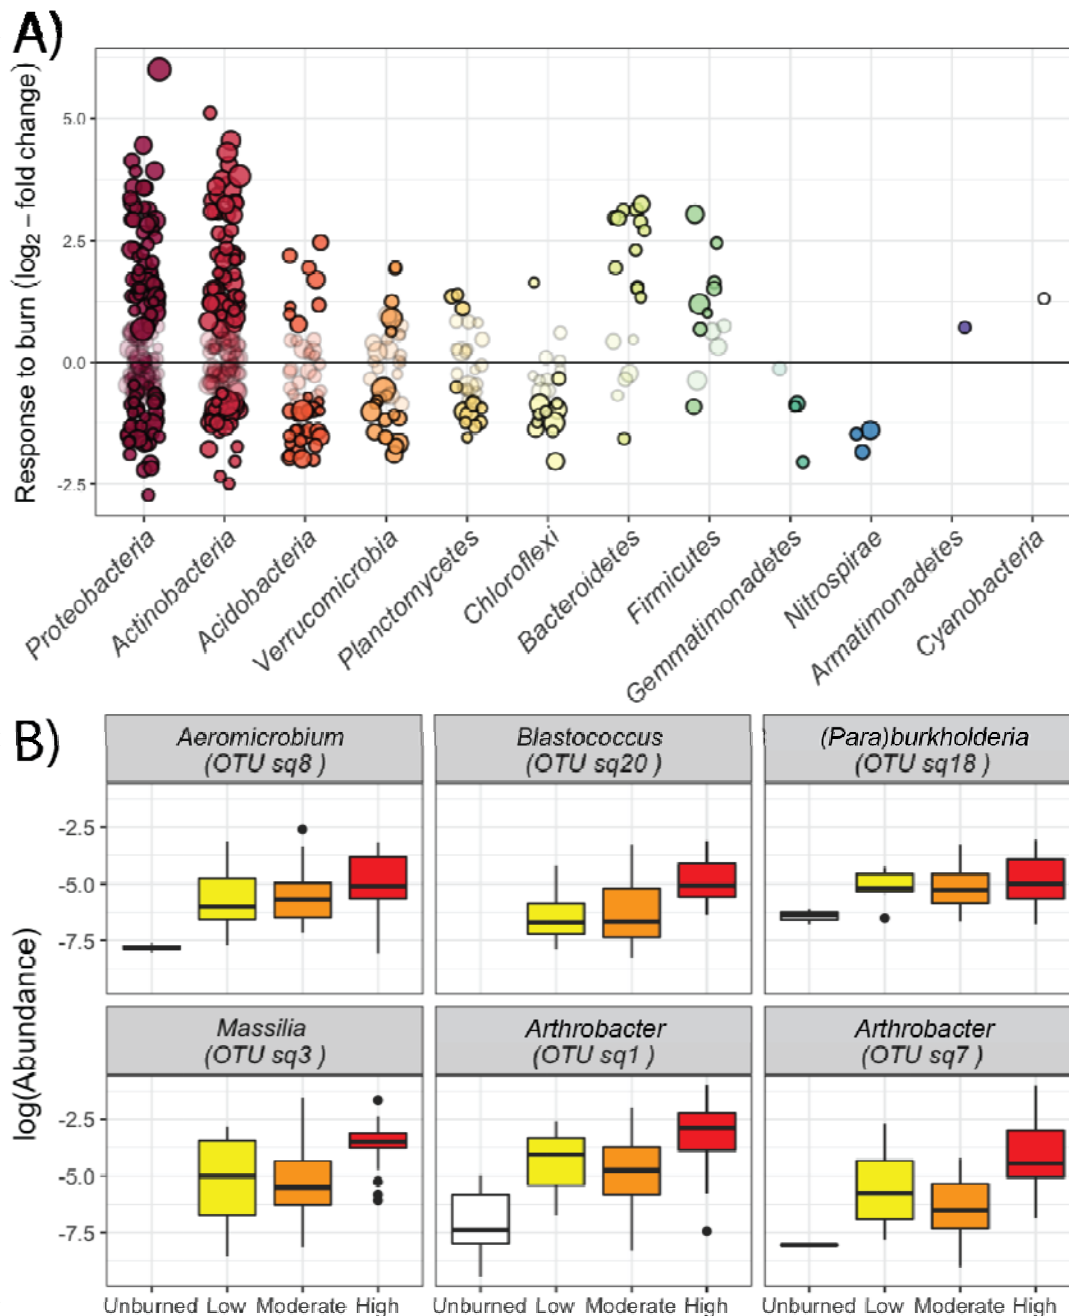

384



385 **Figure 4.** Bacterial response to fire. (A) Log<sub>2</sub>-fold change in burned vs. unburned plots,  
386 controlling for vegetation community, total C, and pH. Each point represents a single  
387 16S rRNA gene v4 region OTU, and the size of each point represents the mean relative  
388 abundance of that OTU across all samples. Faint points represent OTUs that were not  
389 significantly different in abundance in burned vs. unburned plots. (B) Relative  
390 abundance (note log scale) of selected fire-responsive bacterial OTUs across BSI  
391 ranges (unburned=0, 0-2 low, 2-3 moderate, 3-4 high).

392  
393 Numerous fungal OTUs were identified as being significantly enriched (79 OTUs) or  
394 depleted (60 OTUs) in burned vs. unburned sites, after controlling for vegetation  
395 community, total C, and pH (Figure 5A; Supplemental Table 7 and Supplemental Figure  
396 19). There were wide ranges of responses within classes, with the exceptions of  
397 *Dothideomycetes* and *Cystobasidiomycetes* OTUs (which tended to be enriched in  
398 burned sites) and *Mortierellomycotina* subdivision (which tended to be depleted within  
399 burned sites). Certain fungal OTUs also stood out as fire responders. For example, fire-  
400 responsive OTUs included *Neurospora* and *Geopyxis* – genera that include well-known  
401 fire-responsive fungi. The third most abundant OTU was identified as a fire responder  
402 and was classified as *Penicillium* sp. Notable negative fire responders included three  
403 *Oidiodendron* OTUs (Supplemental Figure 20). Different fire-responsive OTUs showed  
404 different trends with burn severity (Figure 5B): the relative abundance of *Penicillium*  
405 (OTUs sq4 and sq65) and one *Fusicladium* (OTU sq24) increased significantly with  
406 increasing burn severity ( $p < 0.05$ ), whereas another *Fusicladium*, *Calyptrozyma*, and  
407 *Sordariomycetes* had a significant fire response, but did not continue to increase in  
408 relative abundance with increasing fire severity ( $p = 0.11$ ,  $0.15$ , and  $0.23$ , respectively).  
409 There were not consistent response patterns within putative mycorrhizal fungi  
410 (Supplemental Table 7).

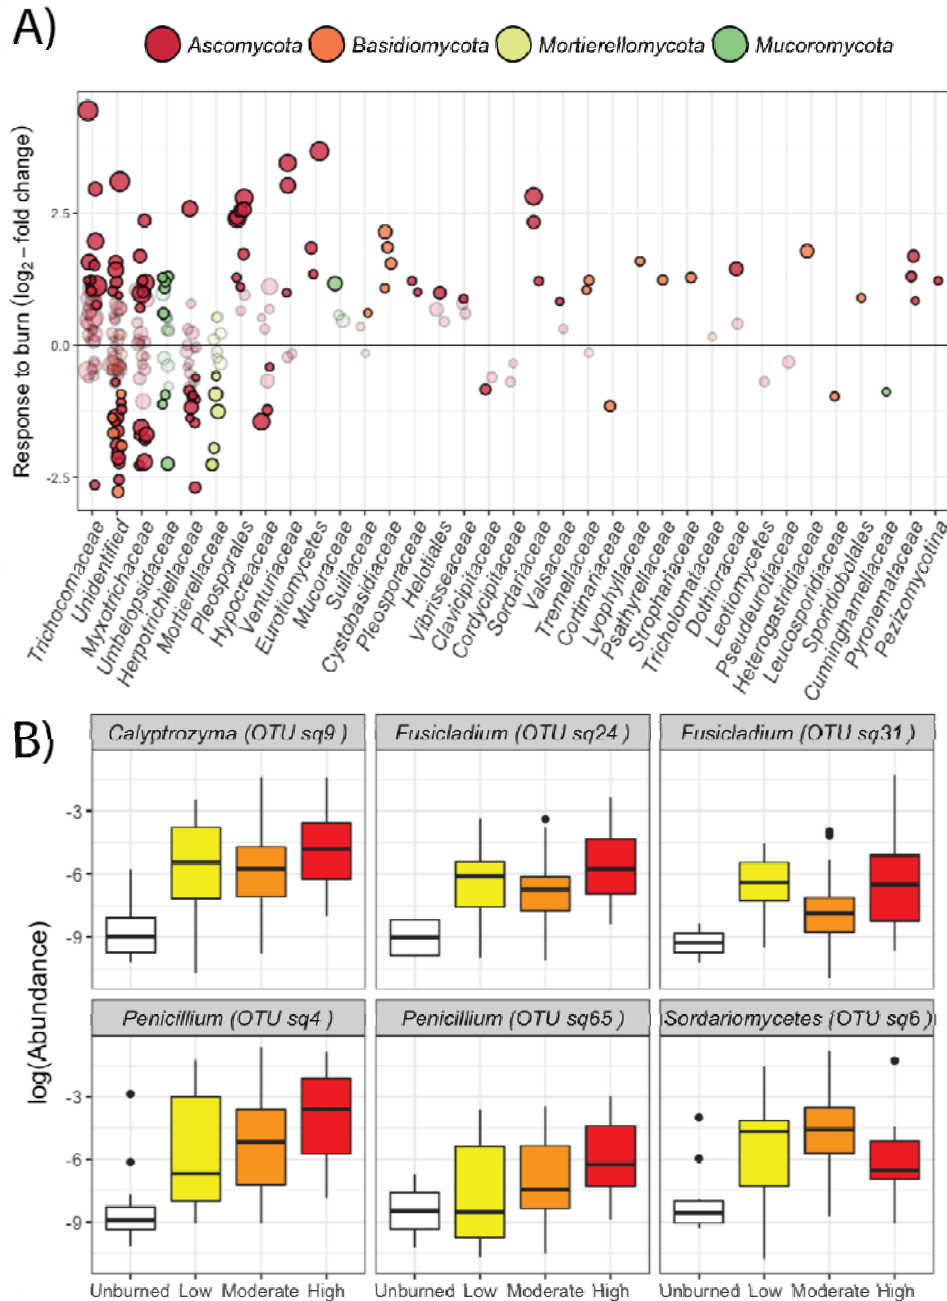

411

412 **Figure 5.** Fungal response to fire. (A)  $\log_2$ -fold change in burned vs. unburned plots,

413 controlling for vegetation community, total C, and pH, arranged by class and coloured

414 by phylum. Each point represents a single ITS2 OTU, and the size of each point

415 represents the mean relative abundance of that OTU across all samples. Faint points

416 represent OTUs that were not significantly different in abundance in burned vs.

417 unburned plots. (B) Relative abundance (note log scale) of selected fire-responsive

418 fungal OTUs across BSI ranges (unburned=0, 0-2 low, 2-3 moderate, 3-4 high).

419 *Co-occurrence network*

420

421 The bacterial and fungal consensus network included 3454 edges or connections, 351  
422 bacterial OTU nodes (~2% of all bacterial OTUs), and 250 fungal OTU nodes (~4% of  
423 all fungal OTUs) (Figure 6A, Supplemental Figures 21-26, Supplemental Tables 8 and  
424 9). However, the OTUs that were retained represented an average of 40% (maximum of  
425 74%) of the community for bacteria and 30% for fungi (maximum of 70%). Of the  
426 bacteria in the network, 48% were at least a 97% ID match for one of the globally  
427 abundant phylotypes designated by Delgado-Baquerizo *et al.* [45] (Supplemental Figure  
428 26). The network had a modularity of 0.58, which is above the threshold of 0.4  
429 suggested to define modular structure [69]. We report the properties of the 8 largest  
430 modules in Supplemental Table 9. Two of the larger modules (1 and 11) contain  
431 numerous OTUs that were identified as fire-responders using the log<sub>2</sub>-fold-change  
432 approach (55% and 82% of OTUs in the module, respectively), while one of the other  
433 larger modules (4) is characterized by negative fire-responders (63%). Module 4 also  
434 contains OTUs that were prevalent in wetter sites (Figure 6C). Module 11 contains  
435 OTUs more prevalent at high pH sites, while Module 1 is characterized OTUs that are  
436 more prevalent at low pH sites (Figure 6B). The networks constructed for O horizons or  
437 mineral horizons including plants are described in Supplemental Tables 8 and 9. They  
438 exhibited similar broad clustering patterns (Supplemental Figures 25-34). Only 1-3  
439 understory plant nodes (*Salix*, *Carex*, and *Geranium*) were retained in the plant  
440 consensus networks.

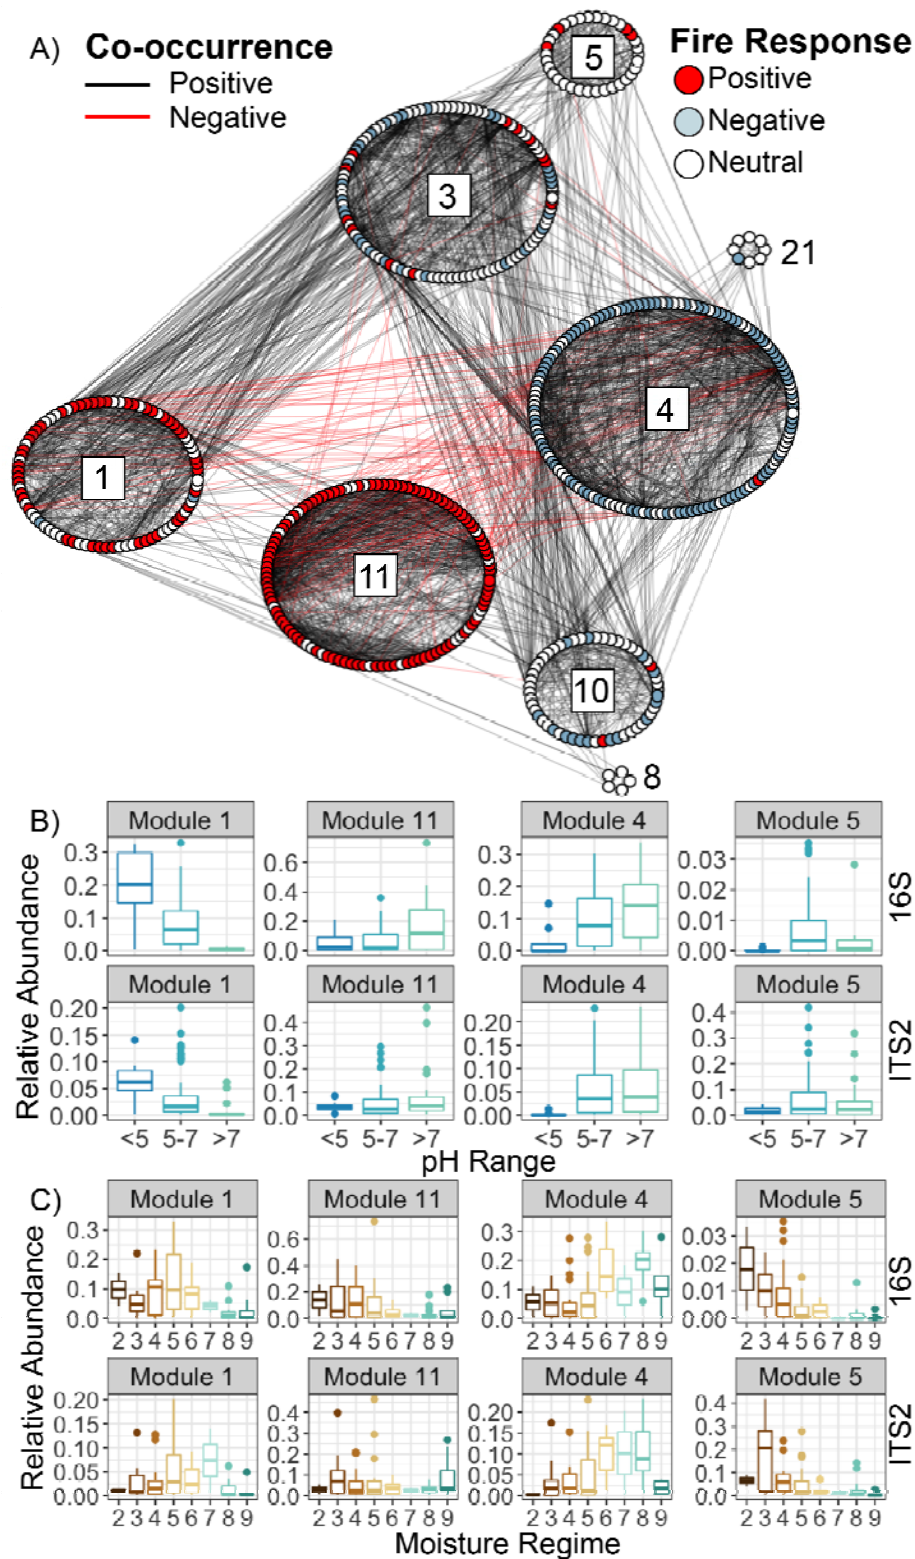

441

442 **Figure 6.** A) Co-occurrence network [16S and ITS2 - Organic and Mineral Horizons],  
 443 arranged into greedy clustering-defined modules. Each point represents an OTU. Points  
 444 are coloured by whether they were identified as being significantly more abundant in

445 burned samples (red) and those significantly less abundant in burned samples (light  
446 blue) or no significant response (white). Lines between points indicate co-occurrences  
447 (black) or co-exclusion (red). Module IDs are indicated with numbers for reference. B)  
448 Module representation across moisture regimes: Fraction of total community  
449 represented by all bacterial (top, 16S) and fungal (bottom, ITS2) OTUs within selected  
450 modules, grouped by moisture regime, 2 being very dry, and 9 being very wet. C)  
451 Module representation across pH values: Fraction of total community represented by all  
452 bacterial (top, 16S) and fungal (bottom, ITS2) OTUs within selected modules grouped  
453 by pH range.

454

## 455 **Discussion**

456

457 *Burn severity metrics are significant predictors of microbial community composition*

458

459 Given the wide range of soil properties and vegetation communities spanned by our  
460 study, we were impressed that the effects of burning on soil microbial communities  
461 stood out so clearly (Figure 2). In addition to the effects of fire, our observation that soil  
462 bacterial communities are more strongly structured by pH (than C), while C is a stronger  
463 predictor (than pH) for soil fungal communities, is consistent with previous findings  
464 [68,70] (Supplemental Note 2). High-throughput sequencing data from this region are  
465 rare, but Masse *et al.* [71] and Turney *et al.* [72] report broadly similar microbial  
466 communities in northern Alberta to those observed in this study (Supplemental Figures  
467 1-4). However, the novelty of this study lies not only in characterizing the soil microbial  
468 communities of - and the effects of fire in - the northern boreal forest in Canada across  
469 a very wide range of conditions. The inclusion of burn severity is an important but often  
470 “missing piece” in assessing the ecological effects of wildfires, which can range from  
471 barely-detectable light surface burns to total tree mortality and complete O horizon  
472 losses.

473

474 Our data suggest that the predicted increases in burn severity for the boreal forest [18-  
475 19] may be accompanied by increasingly disturbed microbial communities (Figure 3A

476 and 3B), although there is little differentiation between different burn severity metrics for  
477 predicting microbial community composition. We observed different response trends  
478 with severity for different taxa (Figures 4B and 5B), suggesting that fires evoke non-  
479 linear responses with increasing severity, and that the shapes of these responses differ  
480 for different fire-responsive taxa. Future studies could be designed explicitly to  
481 investigate these nonlinear relationships between community composition and burn  
482 severity, possibly developing response-based severity categories. Additionally, the  
483 study's sampling timeline (one year post-fire) will affect our detection of different  
484 community responses to different severity levels [73]. For example, if the strongest  
485 effects of fires on soil microbes are driven by changes to the vegetation community [16],  
486 these effects may continue to emerge many years post-fire, while the strongest short-  
487 term effects of direct killing of microbes from the fire's heat may no longer be detectable  
488 one-year post-fire. Furthermore, burn severity metrics – originally developed for plant  
489 communities – integrate effects that are not as relevant to microbes as to plants, diluting  
490 their efficacy as predictors of microbial community composition. Future investigations  
491 could decompose the sub-components of burn severity (e.g., degree of understory  
492 vegetation survival vs. magnitude of combustion of the organic horizon), to determine  
493 which are most influential on microbial community composition, and perhaps develop  
494 microbially-specific burn severity metrics.

495

496 *Specific bacterial and fungal taxa can be identified as fire-responders*

497

498 Globally abundant organisms that we identified as positive fire responders are likely  
499 relevant across diverse ecosystems. For example, Fernández-González *et al.* [74] also  
500 observed that both *Arthrobacter sp.* and *Blastococcus sp.* were significantly enriched in  
501 post-fire soils, but in a very different ecosystem – oak forests in the Sierra Nevada of  
502 Spain. Of their 55 sequenced strains of *Arthrobacter*, 41 isolates were a 100% ID match  
503 for our first *Arthrobacter* (OTU sq1) and 11 were a 99% ID match for the second (OTU  
504 sq7) [74]. Fernández-González *et al.* [74] speculate that *Arthrobacter* may be able to  
505 survive fires due to its ability to resist starvation, desiccation and oxidative stress [25,  
506 75-77]. Then, it may thrive on the fire-affected aromatic C sources [78] and may also

507 play a role in post-fire nitrogen cycling [79] and phosphorus solubilization. These  
508 activities could have important effects on plant growth: Fernández-González *et al.* [74]  
509 demonstrated 40% or greater increases in plant biomass in alfalfa plants inoculated with  
510 a subset of their *Arthrobacter* strains. Thus, our results support their suggestion that  
511 *Arthrobacter* may play an important role in the post-fire microbial ecosystem and  
512 expand their findings to a very different ecosystem – the boreal forest.

513  
514 Our most abundant fungal fire-responder likely also has broad ecological relevance.  
515 Ten *Penicillium sp.* OTUs were identified as positive fire-responders (Supplemental  
516 Table 7), including two that were particularly abundant (OTUs sq4 and sq65; Figure 5B).  
517 *Penicillium* is a common saprotrophic forest microfungus [80], and may be taking  
518 advantage of the post-fire nutrient and C availability. Mikita-Barbato *et al.* [81] also  
519 noted a *Penicillium sp.* that was found at severely burned pine-oak forests in New  
520 Jersey, USA, but was not detected at the unburned sites. The increased abundance of  
521 *Penicillium* at burned sites could have important ecological consequences: in a global  
522 meta-analysis, Bahram *et al.* [68] suggested that increasing fungal antibiotics were  
523 associated with an increase in antibiotic resistance genes (ARGs), particularly in  
524 association with *Penicillium sp.* Thus, if fires increase *Penicillium* abundances, we might  
525 ask, do total bacterial abundances decline and/or do we see an increase in bacteria that  
526 may carry ARGs? In our dataset, there is not a significant relationship between the total  
527 abundance of *Penicillium* and copies of bacterial 16S genes or bacterial 16S : fungal  
528 18S abundance ratios. However, there are significant positive relationships between the  
529 relative abundances of *Penicillium* and the bacterial phylum *Actinobacteria* ( $p=0.001$ )  
530 and the genus *Streptomyces* ( $p<0.001$ ). Still, just as the Bahram *et al.* [68] study is  
531 correlative, so is this study – it is just as possible that the same underlying factors are  
532 increasing both *Penicillium* as well as *Actinobacteria* or *Streptomyces*, rather than that  
533 the fire-induced increase in *Penicillium* is somehow selecting for those bacterial taxa.

534  
535 In addition to the two taxa discussed above, many of the fire-responsive genera we  
536 identified have previously been identified as being enriched post-fire in other studies of  
537 fungi (*e.g.*, *Neurospora sp.* [82] or *Geopyxis sp.* [83]; Supplemental Note 4) or bacteria

538 [25,79,81,84-85] (Supplemental Note 5). Just like well-established fire-response  
539 strategies for plants, there are likely a series of fire-response strategies for microbes  
540 (conceptual model illustrated in Figure 7). The first possible trait – fast growth post-fire  
541 (as suggested by significantly higher mean predicted 16S gene copy numbers for  
542 communities from more severely burned sites, and within positive fire-responders) –  
543 may allow a microbe to take advantage of a habitat newly depleted of competitors.  
544 Some of the strongest fire-responders (Figure 4) have particularly high predicted copy  
545 numbers – e.g., *Massilia* sp. (OTU sq2) has a predicted copy number of 7, while the  
546 *Arthrobacter* sp. (OTU sq1) has one of 5.71. This trait has been previously associated  
547 with the bacteria that make up early-successional communities, including another post-  
548 fire system [58]. It has been suggested that this trait may allow bacteria to grow more  
549 quickly [86-87], allowing them to rapidly take advantage of post-fire resources.

550

551 A second trait that could allow microbes to thrive post-fire would be the ability to exploit  
552 resources created by the fire – for example, changes in nutrient availability [88]  
553 (Supplemental Note 6) or fire-affected organic matter, which is characterized by an  
554 increased abundance of aromatic C structures [89]. Many of our most abundant fire-  
555 responsive bacterial taxa (*Aeromicrobium*, *Massilia*, and *Burkholderia-Paraburkholderia*)  
556 are genetically identical in the sequenced region to organisms that have been identified  
557 as aromatic C-degraders [85,90-91] (Supplemental Note 7). Similarly, numerous fungi  
558 with lignolytic capabilities are also able to degrade other aromatic C structures, and  
559 include species within the genera *Penicillium* and *Mucor*, for which we identified positive  
560 fire-responsive OTUs [34,92] (Figure 5; Supplemental Table 7).

561

562 A third potential fire responder trait is survival at elevated temperatures [93-94]  
563 (although increased temperatures from fire rapidly attenuate with soil depth [95]). In a  
564 study of tree bark-associated fungi in Australia, three *Penicillium* spp. were isolated that  
565 could withstand temperatures above 105 °C for one hour, and the authors also noted  
566 that teleomorphic taxa (taxa in the sexual reproductive stage) were only found in the  
567 heat-treated bark, suggesting that the heat of fires may revive ascospores from  
568 dormancy [96]. Because we sampled sites one-year post-fire, the longer-term effects of



569 fire (changes to the soil environment or vegetation) may be playing a larger role than  
570 the immediate post-fire effects of the direct killing of organisms during the fire, which  
571 might be most important in the weeks or months right after the fire.  
572

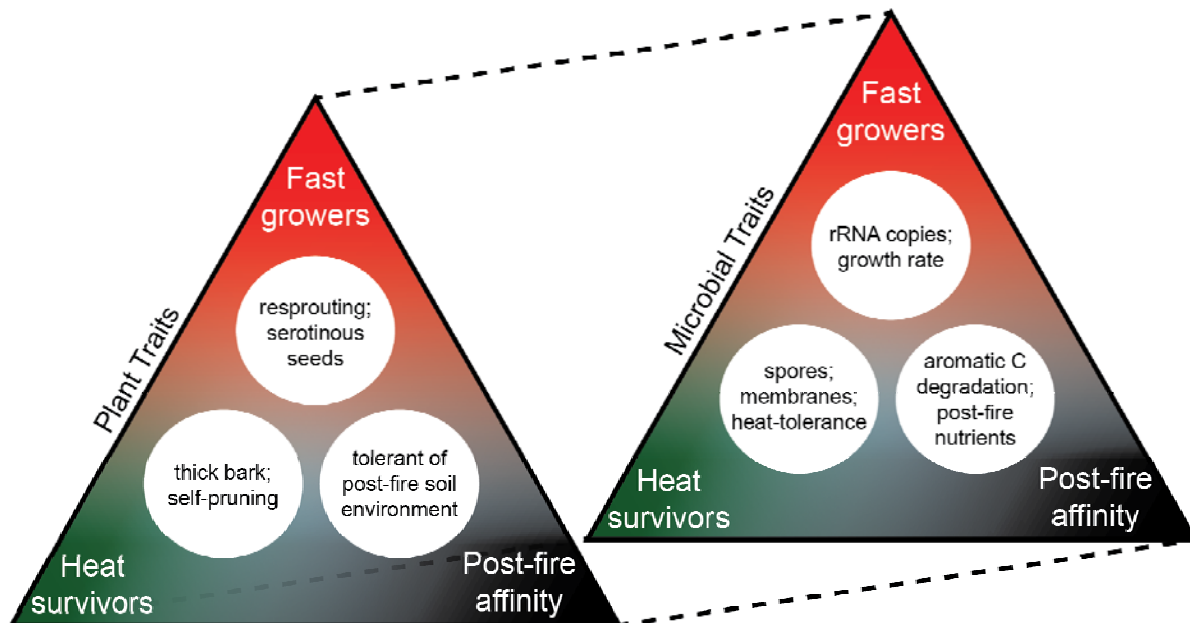

573  
574 **Figure 7.** Conceptual figure of hypothesized parallels between fire response strategies  
575 for plants and microbes. Layered on top of these traits would be ecological interactions  
576 between organisms in the post-fire community.  
577

578 In addition to heat survival, fast growth, and the ability to take advantage of post-fire  
579 resources, interactions between fire-responders and other members of the ecosystem,  
580 including plants and animals, will structure post-fire communities. For example, one  
581 OTU identified as a 100% match with *Fimetariella rabenhorstii* was significantly  
582 enriched with fire, and has commonly been found in the dung of boreal herbivores [97].  
583 This is consistent with animal studies that suggest that herbivory may increase post-fire  
584 as plants regenerate [98-100], and the observation that our study region is inhabited by  
585 wood bison that likely benefit from fire clearing grazing areas. With respect to plants,  
586 two of the fungal taxa we identified as significant fire-responders were classified as  
587 *Fusicladium sp.*, and two as *Phoma sp.* These genera are rated as “probable” and  
588 “highly probable” plant pathogens within the FUNGuild classification system [48,101],

589 and one interpretation could be that they are exploiting damaged trees post-fire.  
590 However, *Fusicladium* has also been isolated from pine litter [102], and may just as  
591 likely be living as a saprotroph on fire-killed litter [103]. Similarly, *Phoma* is also known  
592 to exhibit saprotrophic strategies [104]. Other putative plant-associated fungi  
593 (pathogenic or non-pathogenic endophytes) were enriched in burned sites (three  
594 *Venturia* or *Fusicladium* OTUs). However, we are not able to point to clear broad trends  
595 across plant-associated fungal guilds, including ectomycorrhizae, in this dataset  
596 (Supplemental Table 7). Additionally, we stress that even 100% ID matches may not  
597 have the same functional potential or activity as the organisms identified in reference  
598 databases; further study would be required to demonstrate these suggestions. Still,  
599 such inter-kingdom interactions merit further study, as they could have implications for  
600 the post-fire community assembly in plants and fungi, and the effects of post-fire  
601 microbial communities on the broader ecosystem. For example, anecdotally, we have  
602 observed patches of jack pine in this region that grow back as unusually dense stands  
603 of slow-growing trees after very severe fires. It would be fascinating to determine  
604 whether this “stalled growth” could possibly be related to shifts in the microbial  
605 community, such as the loss of necessary symbionts.

606

#### 607 *Co-occurrence network clusters by fire effects, pH, and moisture regime*

608

609 The most interesting observation for the network is that the taxa cluster in modules that  
610 are associated with fire effects (Figure 6) – the majority of taxa in modules 1 and 11  
611 were independently identified as being positive fire-responders (Figures 4 and 5;  
612 Supplemental Tables 6, 7, and 9), many of which are close matches for globally  
613 abundant taxa (Supplemental Figure 26). This could prompt future research asking  
614 whether the remaining taxa in these modules also respond positively to fire. We also  
615 noticed that the two fire-responsive modules (1 and 11) clustered separately – *i.e.*,  
616 despite both containing a large proportion of fire-responsive taxa, there are few co-  
617 occurrences between the two modules. Our most likely explanation for this is pH:  
618 bacterial OTUs from module 1 tend to be more abundant in lower pH soils from across a  
619 wide moisture gradient, while bacterial OTUs from module 11 tend to be more abundant

620 in higher pH soils specific to drier ecosystems (Figure 6C). Thus, we might interpret  
621 bacterial OTUs in module 11 as broadly representing the high pH fire-responders, and  
622 the bacterial OTUs in module 1 as broadly representing the low pH fire-responders.

623  
624 Many negative fire-responders are captured by Module 4 (Figure 6), which also includes  
625 OTUs associated with neutral-high pH (Supplemental Figure 23). This module has a  
626 higher abundance in wetlands than other modules do (Figure 6B; Supplemental Table  
627 9), but this largely reflects that wetlands tended to be less severely burned, not that  
628 negative fire-responders are generally adapted to wetlands, *per se*. This raises an  
629 interesting question of whether wetlands, which tend to burn less severely, play any  
630 notable role in seeding the post-fire recovery and reestablishment of microbial  
631 communities within the larger, patchwork, landscape. Overall, the network analysis  
632 identifies several clusters of fire- and pH-responsive taxa, which could inform future  
633 investigations of whether similar patterns are found in different ecosystems that are also  
634 affected by fire and to further disentangle the effects of fire on microbes as mediated by  
635 changes to vegetation communities and soil properties.

636

## 637 **Conclusions**

638

639 Despite high cross-site variability, we identified an effect of fire severity on microbial  
640 community composition. Building on the efforts of previous studies, our results identify  
641 specific fire-responsive microbial taxa, provide support for possible successful post-fire  
642 ecological strategies, and suggest that accounting for burn severity could improve our  
643 understanding of their response to fires, with potentially important implications for  
644 ecosystem functions. Future studies might investigate the most microbially-relevant sub-  
645 components of burn severity metrics, continue to classify and test for specific ecological  
646 strategies of fire-responsive microbes, establish the timescale over which these effects  
647 persist, and determine how prevalent these specific microbial responses to fire are  
648 across different ecosystems.

649

650

651 **Acknowledgements**

652

653 The Government of the Northwest Territories provided in-kind and financial support for  
654 the field campaign that produced these data. We also thank Parks Canada Agency and  
655 Jean Morin for in-kind support during fieldwork. We acknowledge and thank Xinli Cai, G.  
656 Matt Davies, Kathleen Groenewegen, Derek Hall, Koreen Millard, and Doug Stiff for  
657 their indispensable assistance in the field. The U.S. Department of Energy award DE-  
658 SC0016365 helped support T.W.

659

660 **Competing Interests**

661

662 The authors declare no competing interests.

663

664 **Supplemental Information**

665

666 Supplemental information files are available online at XXX. All sequences are deposited  
667 in the NCBI SRA under accession numbers XXX. Code for the analyses conducted in  
668 this paper are available at  
669 [GitHub.com/TheaWhitman/WoodBuffalo/Paper\\_Analyses\\_Figures](https://github.com/TheaWhitman/WoodBuffalo/Paper_Analyses_Figures).

670

671 **References**

672

673 1. Bradshaw CJA, Warkentin IG. (2015). Global estimates of boreal forest carbon stocks  
674 and flux. *Global and Planetary Change* **128**: 24–30.

675 2. Brandt JP, Flannigan MD, Maynard DG, Thompson ID, Volney WJA. (2013). An  
676 introduction to Canada's boreal zone: ecosystem processes, health, sustainability, and  
677 environmental issues. *Environmental Reviews* **21**: 207–226.

678 3. Burton PJ, Parisien M-A, Hicke JA, Hall RJ, Freeburn JT. (2008). Large fires as  
679 agents of ecological diversity in the North American boreal forest. *International Journal*  
680 *of Wildland Fire* **17**: 754–767.

681 4. de Groot WJ, Flannigan MD, Cantin AS. (2013). Climate change impacts on future  
682 boreal fire regimes. *Forest Ecology and Management* **294**: 35–44.

683 5. Pellegrini AFA, Ahlström A, Hobbie SE, Reich PB, Nieradzik LP, Staver AC, *et al.*  
684 (2017). Fire frequency drives decadal changes in soil carbon and nitrogen and  
685 ecosystem productivity. *Nature* **313**: 940.

686 6. Bond-Lamberty B, Peckham SD, Ahl DE, Gower ST. (2007). Fire as the dominant  
687 driver of central Canadian boreal forest carbon balance. *Nature* **450**: 89–92.

688 7. Tarnocai C, Kettles I, Lacelle B. (2011). Peatlands of Canada. Geological Survey of  
689 Canada Open File 6561. Geological Survey of Canada, Ottawa, Ontario.  
690 <http://dx.doi.org/10.4095/288786>.

691 8.

692 7. Seaver FJ. (1909). Studies in pyrophilous fungi: I. The occurrence and cultivation of  
693 *Pyronema*. *Mycologia* **1**: 131-139.

694 8. Roulet N. (2000). Peatlands, carbon storage, greenhouse gases, and the Kyoto  
695 Protocol: Prospects and significance for Canada. *Wetlands* **20**: 605-615.

696 9. Harper RA. (1900). Sexual reproduction in *Pyronema confluens* and the morphology  
697 of the ascocarp. *Annals of Botany* **14**: 321-400.

- 698 10. Boudier M. (1877). De quelques espèces nouvelles de champignons. *Bulletin de la*  
699 *Société Botanique de France* **24**: 307-312.
- 700 11. Pressler Y, Moore JC, Cotrufo MF. (2018). Belowground community responses to  
701 fire: meta-analysis reveals contrasting responses of soil microorganisms and  
702 mesofauna. *Oikos*. e-pub ahead of print, doi: 10.1111/oik.05738.
- 703 12. Holden SR, Treseder KK. (2013). A meta-analysis of soil microbial biomass  
704 responses to forest disturbances. *Frontiers in Microbiology* **4**: 1–17.
- 705 13. Dooley SR, Treseder KK. (2011). The effect of fire on microbial biomass: a meta-  
706 analysis of field studies. *Biogeochemistry* **109**: 49–61.
- 707 14. Dove NC, Hart SC. (2017). Fire Reduces Fungal Species Richness and In Situ  
708 Mycorrhizal Colonization: A Meta-Analysis. *Fire Ecology* **13**: 37–65.
- 709 15. Ferrenberg S, O'Neill SP, Knelman JE, Todd B, Duggan S, Bradley D, *et al.* (2013).  
710 Changes in assembly processes in soil bacterial communities following a wildfire  
711 disturbance. *The ISME Journal* **7**: 1102–1111.
- 712 16. Hart SC, DeLuca TH, Newman GS, MacKenzie MD, Boyle SI. (2005). Post-fire  
713 vegetative dynamics as drivers of microbial community structure and function in forest  
714 soils. *Forest Ecology and Management* **220**: 166–184.
- 715 17. Ryan KC. (1991). Vegetation and wildland fire: Implications of global climate  
716 change. *Environment International* **17**: 169-178.
- 717 18. Flannigan M, Stocks B, Turetsky M, Wotton M. (2009). Impacts of climate change  
718 on fire activity and fire management in the circumboreal forest. *Global Change Biology*  
719 **15**: 549–560.
- 720 19. Wotton BM, Flannigan MD, Marshall GA. (2017). Potential climate change impacts  
721 on fire intensity and key wildfire suppression thresholds in Canada. *Environmental*  
722 *Research Letters* **12**: 095003.
- 723 20. Keeley JE. (2012). Ecology and evolution of pine life histories. *Annals of Forest*  
724 *Science* **69**: 445–453.

- 725 21. Parks SA, Dillon GK, Miller C. (2014). A New Metric for Quantifying Burn Severity:  
726 The Relativized Burn Ratio. *Remote Sensing* **6**: 1827–1844.
- 727 22. Bergner B, Johnstone J, Treseder KK. (2004). Experimental warming and burn  
728 severity alter soil CO<sub>2</sub> flux and soil functional groups in a recently burned boreal forest.  
729 *Global Change Biology* **10**: 1996–2004.
- 730 23. Holden SR, Rogers BM, Treseder KK, Randerson JT. (2016). Fire severity  
731 influences the response of soil microbes to a boreal forest fire. *Environmental*  
732 *Research Letters* **11**: 10.
- 733 24. Kennedy NM, Robertson SJ, Green DS, Scholefield SR, Arocena JM, Tackaberry  
734 LE, *et al.* (2014). Site properties have a stronger influence than fire severity on  
735 ectomycorrhizal fungi and associated N-cycling bacteria in regenerating post-beetle-  
736 killed lodgepole pine forests. *Folia Microbiologica* **60**: 399–410.
- 737 25. Weber CF, Lockhart JS, Charaska E, Aho K, Lohse KA. (2014). Bacterial  
738 composition of soils in ponderosa pine and mixed conifer forests exposed to different  
739 wildfire burn severity. *Soil Biology and Biochemistry* **69**: 242–250.
- 740 26. Knelman JE, Graham EB, Trahan NA, Schmidt SK, Nemergut DR. (2015). Fire  
741 severity shapes plant colonization effects on bacterial community structure, microbial  
742 biomass, and soil enzyme activity in secondary succession of a burned forest. *Soil*  
743 *Biology and Biochemistry* **90**: 161–168.
- 744 27. Loboda TV, French NHF, Hight-Harf C, Jenkins L, Miller ME. (2013). Mapping fire  
745 extent and burn severity in Alaskan tussock tundra: an analysis of the spectral response  
746 of tundra vegetation to wildland fire. *Remote Sensing of Environment* **134**: 194–209.
- 747 28. Kasischke ES, O'Neill KP, French NHF, Bourgeau-Chavez LL. (2000). Controls on  
748 patterns of biomass burning in Alaskan boreal forests. pp. 173–196 in ES Kasischke  
749 and BJ Stocks, Eds.. *Fire, climate change, and carbon cycling in the boreal forest*.  
750 Springer, New York, New York, USA.
- 751 29. Key CH, Benson NC. (2006). *Landscape assessment (LA): sampling and analysis*  
752 *methods*. USDA Forest Service General Technical Report RMRS- GTR-164-CD. LA1–

- 753 LA51. USDA Forest Service, Rocky Mountain Research Station, Fort Collins, Colorado,  
754 USA.
- 755 30. Kasischke ES, Turetsky MR, Ottmar RD, French NHF, Hoy EE, Kane ES. (2008).  
756 Evaluation of the composite burn index for assessing fire severity in Alaskan black  
757 spruce forests. *International Journal of Wildland Fire* **17**: 515–526.
- 758 31. Whitman E, Parisien M-A, Thompson DK, Hall RJ, Skakun RS, Flannigan MD.  
759 (2018b). Variability and drivers of burn severity in the northwestern Canadian boreal  
760 forest. *Ecosphere* **9**. e02128.
- 761 32. Whitman E, Parisien M-A, Thompson D, Flannigan M. (2018a). Topoedaphic and  
762 Forest Controls on Post-Fire Vegetation Assemblies Are Modified by Fire History and  
763 Burn Severity in the Northwestern Canadian Boreal Forest. *Forests* **9**: 151.
- 764 33. ESWG [Ecological Stratification Working Group]. (1995). *A national ecological*  
765 *framework for Canada*. Agriculture and Agri-Food Canada, Ottawa, Ontario/Hull,  
766 Quebec, Canada.
- 767 34. Wang S, Li X, Liu W, Li P, Kong L, Ren W, *et al.* (2012). Degradation of pyrene by  
768 immobilized microorganisms in saline-alkaline soil. *Journal of Environmental Sciences*  
769 **24**: 1662–1669.
- 770 35. Boulanger Y, Gauthier S, Burton PJ, Vail-lancourt M-A. (2012). An alternative fire  
771 regime zonation for Canada. *International Journal of Wildland Fire* **21**: 1052–1064.
- 772 36. Stocks BJ, Mason JA, Todd JB, Bosch EM, Wotton BM, Amiro BD, Flannigan MD,  
773 Hirsch KG, Logan KA, Martell DL, Skinner WR. (2002). Large forest fires in Canada,  
774 1959–1997. *Journal of Geophysical Research* **108**: FFR 5-1–FFR 5-12.
- 775 37. Beckingham JD, Archibald JG. (1996). *Field guide to ecosites of Northern Alberta*.  
776 Natural Resources Canada, Canadian Forest Service, Northern Forestry Centre,  
777 Edmonton, Alberta, Canada.
- 778 38. Walters W, Hyde ER, Berg-Lyons D, Ackermann G, Humphrey G, Parada A, *et al.*  
779 (2015). Improved Bacterial 16S rRNA Gene (V4 and V4-5) and Fungal Internal  
780 Transcribed Spacer Marker Gene Primers for Microbial Community Surveys. *mSystems*  
781 **1**: e00009–15.



- 782 39. Taylor DL, Walters WA, Lennon NJ, Bochicchio J, Krohn A, Caporaso JG, *et al.*  
783 (2016). Accurate Estimation of Fungal Diversity and Abundance Through Improved  
784 Lineage-Specific Primers Optimized for Illumina Amplicon Sequencing. *Applied and*  
785 *Environmental Microbiology* **82**: AEM.02576–16–7226.
- 786 40. Kozich JJ, Westcott SL, Baxter NT, Highlander SK, Schloss PD. (2013).  
787 Development of a Dual-Index Sequencing Strategy and Curation Pipeline for Analyzing  
788 Amplicon Sequence Data on the MiSeq Illumina Sequencing Platform. *Applied and*  
789 *Environmental Microbiology* **79**: 5112–5120.
- 790 41. Callahan BJ, McMurdie PJ, Rosen MJ, Han AW, Johnson AJA, Holmes SP. (2016).  
791 DADA2: High-resolution sample inference from Illumina amplicon data. *Nature Methods*  
792 **13**: 581–583.
- 793 42. Zhang J, Kobert K, Flouri T, Stamatakis A. (2014). PEAR: a fast and accurate  
794 Illumina Paired-End reAd mergeR. *Bioinformatics* **30**: 614–620.
- 795 43. Caporaso JG, Kuczynski J, Stombaugh J, Bittinger K, Bushman FD, Costello EK, *et*  
796 *al.* (2010). QIIME allows analysis of high-throughput community sequencing data.  
797 *Nature Methods* **7**: 335–336.
- 798 44. Pruesse E, Quast C, Knittel K, Fuchs BM, Ludwig W, Peplies J, *et al.* (2007). SILVA:  
799 a comprehensive online resource for quality checked and aligned ribosomal RNA  
800 sequence data compatible with ARB. - PubMed - NCBI. *Nucleic Acids Res* **35**: 7188–  
801 7196.
- 802 45. Delgado-Baquerizo M, Oliveria, AM, Brewer TE, Benavent-González A, Eldridge DJ,  
803 Bardgett RD, Maestre FT, Singh BK, Fierer N (2018). A global atlas of the dominant  
804 bacteria found in soil. *Science* **359**: 320-325.
- 805 46. Bengtsson-Palme J, Ryberg M, Hartmann M, Branco S, Wang Z, Godhe A, *et al.*  
806 (2013). Improved software detection and extraction of ITS1 and ITS2 from ribosomal  
807 ITS sequences of fungi and other eukaryotes for analysis of environmental sequencing  
808 data. *Methods Ecol Evol* **4**: 914–919.
- 809 47. UNITE Community (2017): UNITE QIIME release. Version 01.12.2017. UNITE  
810 Community. <https://doi.org/10.15156/BIO/587481>.

- 811 48. Nguyen NH, Song Z, Bates ST, Branco S, Tedersoo L, Menke J, *et al.* (2016).  
812 FUNGuild: An open annotation tool for parsing fungal community datasets by ecological  
813 guild. *Fungal Ecology* **20**: 241–248.
- 814 49. Carini P, Marsden PJ, Leff JW, Morgan EE, Strickland MS, Fierer N. (2016). Relic  
815 DNA is abundant in soil and obscures estimates of soil microbial diversity. *Nature*  
816 *Microbiology* **2**: 16242.
- 817 50. Prévost-Bouré NC, Christen R, Dequiedt S, Mougel C, Lelièvre M, Jolivet C, *et al.*  
818 Validation and Application of a PCR Primer Set to Quantify Fungal Communities in the  
819 Soil Environment by Real-Time Quantitative PCR. *PLoS ONE* **6**: e24166.
- 820 51. McMurdie PJ, Holmes S. (2013). phyloseq: An R Package for Reproducible  
821 Interactive Analysis and Graphics of Microbiome Census Data. *PLoS ONE* **8**: e61217.
- 822 52. Wickham H. ggplot2: Elegant Graphics for Data Analysis. <http://ggplot2.org>.
- 823 53. Wickham H, François R, Henry L, Müller K. dplyr: A Grammar of Data Manipulation.  
824 <https://CRAN.R-project.org/package=dplyr>.
- 825 54. R Core Team. R: A language and environment for statistical computing.
- 826 55. Legendre P, Gallagher ED. (2001). Ecologically meaningful transformations for  
827 ordination of species data. *Oecologia* **129**: 271–280.
- 828 56. Oksanen J, Blanchet FG, Kindt R, Legendre P, Minchin PR, O'Hara RB, *et al.* vegan:  
829 Community Ecology Package.
- 830 57. Stoddard SF, Smith BJ, Hein R, Roller BRK, Schmidt TM. (2015). rrnDB: improved  
831 tools for interpreting rRNA gene abundance in bacteria and archaea and a new  
832 foundation for future development. *Nucleic Acids Res* **43**: D593–D598.
- 833 58. Nemergut DR, Knelman JE, Ferrenberg S, Bilinski T, Melbourne B, Jiang L, *et al.*  
834 (2016). Decreases in average bacterial community rRNA operon copy number during  
835 succession. *Nature Publishing Group* **10**: 1147–1156.
- 836 59. Willis A, Bunge J, Whitman T. (2016). Improved detection of changes in species  
837 richness in high diversity microbial communities. *Journal of the Royal Statistical Society:*  
838 *Series C (Applied Statistics)* **10**: 1496.

- 839 60. Paulson JN, Stine OC, Bravo HC, Pop M. (2013). Differential abundance analysis  
840 for microbial marker-gene surveys. *Nature Methods* **10**: 1200–1202.
- 841 61. Connor N, Barberán A, Clauset A. (2017). Using null models to infer microbial co-  
842 occurrence networks. *PLoS ONE* **12**: e0176751.
- 843 62. Guimera R, Amaral L. (2005). Functional cartography of complex metabolic  
844 networks. *Nature* **433**: 895–900.
- 845 63. Olesen J, Bascompte J, Dupont Y, Jordano P. (2007). The modularity of pollination  
846 networks. *Proceedings of the National Academy of Sciences* **104**: 19891–19896.
- 847 64. Zhou J, Deng Y, Luo F, He Z, Tu Q, Zhi X. (2010). Functional molecular ecological  
848 networks. *mBio* **1**: 1–10.
- 849 65. Deng Y, Jiang Y-H, Yang Y, He Z, Luo F, Zhou J. (2012). Molecular ecological  
850 network analyses. *BMC Bioinformatics* **13**: 113.
- 851 66. Shi S, Nuccio EE, Shi ZJ, He Z, Zhou J, Firestone MK. (2016). The interconnected  
852 rhizosphere: High network complexity dominates rhizosphere assemblages. *Ecology*  
853 *Letters* **19**: 926-936.
- 854 67. Csardi G, Nepusz T: The igraph software package for complex network research,  
855 InterJournal, Complex Systems 1695. 2006. <http://igraph.org>
- 856 68. Bahram M, Hildebrand F, Forslund SK, Anderson JL, Soudzilovskaia NA, Bodegom  
857 PM, *et al.* (2018). Structure and function of the global topsoil microbiome. *Nature* **320**: 1.
- 858 69. Newman M. (2006). Modularity and community structure in networks. *Proceedings*  
859 *of the National Academy of Sciences* **103**: 8577–8582.
- 860 70. Fierer N, Jackson RB. (2006). The diversity and biogeography of soil bacterial  
861 communities. *Proceedings of the National Academy of Sciences* **103**: 626–631.
- 862 71. Masse J, Prescott CE, Renaut S, Terrat Y, Grayston SJ. (2017). Plant Community  
863 and Nitrogen Deposition as Drivers of Alpha and Beta Diversities of Prokaryotes in  
864 Reconstructed Oil Sand Soils and Natural Boreal Forest Soils. *Applied and*  
865 *Environmental Microbiology* **83**. e-pub ahead of print, doi: 10.1128/AEM.03319-16.

- 866 72. Turney S, Altshuler I, Whyte LG, Buddle CM. (2018). Macroinvertebrate and soil  
867 prokaryote communities in the forest–tundra ecotone of the Subarctic Yukon. *Polar*  
868 *Biology* **41**: 1619–1633.
- 869 73. Ludwig SM, Alexander HD, Kielland K, Mann PJ, Natali SM, Ruess RW. (2017). Fire  
870 severity effects on soil carbon and nutrients and microbial processes in a Siberian larch  
871 forest. *Global Change Biology*, **24**: 5841-5852.
- 872 74. Fernández-González AJ, Martínez-Hidalgo P, Cobo-Díaz JF, Villadas PJ, Martínez-  
873 Molina E, Toro N, *et al.* (2017). The rhizosphere microbiome of burned holm-oak:  
874 potential role of the genus *Arthrobacter* in the recovery of burned soils. *Scientific*  
875 *Reports* **7**: 6008.
- 876 75. SantaCruz-Calvo L, González-López J, Manzanera M. (2013). *Arthrobacter*  
877 *siccitolerans* sp. nov., a highly desiccation-tolerant, xeroprotectant-producing strain  
878 isolated from dry soil. *International Journal of Systematic and Evolutionary Microbiology*  
879 **63**: 4174–4180.
- 880 76. Mongodin EF, Shapir N, Daugherty SC, DeBoy RT, Emerson JB, Shvartzbeyn A,  
881 Radune D, Vamathevan J, Riggs F, Grinberg V, Khouri H, Wackett LP, Nelson KE,  
882 Sadowsky MJ. (2006). Secrets of soil survival revealed by the genome sequence of  
883 *Arthrobacter aurescens* TC1. *PLoS Genetics*. **2**: e214.
- 884 77. Manzanera M, Narváez-Reinaldo JJ, García-Fontana C, Vílchez JI, González-López  
885 J. (2015). Genome sequence of *Arthrobacter koreensis* 5J12A, a plant growth-  
886 promoting and desiccation-tolerant strain. *Genome Announcements* **3**: e00648–15.
- 887 78. Westerberg K, Elvang AM, Stackebrandt E, Jansson JK. (2000). *Arthrobacter*  
888 *chlorophenolicus* sp nov., a new species capable of degrading high concentrations of 4-  
889 chlorophenol. *International Journal of Systematic and Evolutionary Microbiology* **50**:  
890 2083–2092.
- 891 79. Cobo-Díaz JF, Fernández-González AJ, Villadas PJ, Robles AB, Toro N,  
892 Fernández-López M. (2015). Metagenomic Assessment of the Potential Microbial  
893 Nitrogen Pathways in the Rhizosphere of a Mediterranean Forest After a Wildfire.  
894 *Microbial Ecology* **69**: 895–904.

- 895 80. Lumley TC, Gignac LD, Currah RS. (2011). Microfungus communities of white  
896 spruce and trembling aspen logs at different stages of decay in disturbed and  
897 undisturbed sites in the boreal mixedwood region of Alberta. *Canadian Journal of*  
898 *Botany* **79**: 76–92.
- 899 81. Mikita-Barbato RA, Kelly JJ, Tate RL III. (2015). Wildfire effects on the properties  
900 and microbial community structure of organic horizon soils in the New Jersey Pinelands.  
901 *Soil Biology and Biochemistry* **86**: 67–76.
- 902 82. Jacobson DJ, Powell AJ, Dettman JR, Saenz GS, Barton MM, Hiltz MD, *et al.*  
903 (2004). *Neurospora* in temperate forests of western North America. *Mycologia* **96**: 66–  
904 74.
- 905 83. Greene DF, Hesketh M, Pouden E. (2017). Emergence of morel (*Morchella*) and  
906 pixie cup (*Geopyxis carbonaria*) ascocarps in response to the intensity of forest floor  
907 combustion during a wildfire. *Mycologia* **102**: 766–773.
- 908 84. Sun H, Santalahti M, Pumpanen J, Köster K, Berninger F, Raffaello T, *et al.* (2016).  
909 Bacterial community structure and function shift across a northern boreal forest fire  
910 chronosequence. *Scientific Reports* **6**: 34.
- 911 85. Guo M, Gong Z, Miao R, Rookes J, Cahill D, Zhuang J. (2017). Microbial  
912 mechanisms controlling the rhizosphere effect of ryegrass on degradation of polycyclic  
913 aromatic hydrocarbons in an aged-contaminated agricultural soil. *Soil Biology and*  
914 *Biochemistry* **113**: 130–142.
- 915 86. Klappenbach JA, Dunbar JM, Schmidt TM. (2000). rRNA operon copy number  
916 reflects ecological strategies of bacteria. *Applied and Environmental Microbiology* **66**:  
917 1328-1333.
- 918 87. Vieira-Silva S, Rocha EPC. (2010). The systemic imprint of growth and its uses in  
919 ecological (meta)genomics. *PLoS Genetics* **6**: e1000808.
- 920 88. Allison SD, Gartner TB, Mack MC, McGuire K, Treseder K. (2010). Nitrogen alters  
921 carbon dynamics during early succession in boreal forest. *Soil Biology and Biochemistry*  
922 **42**: 1157–1164.

- 923 89. Reisser M, Purves RS, Schmidt MWI, Abiven S. (2016). Pyrogenic Carbon in Soils:  
924 A Literature-Based Inventory and a Global Estimation of Its Content in Soil Organic  
925 Carbon and Stocks. *Front Earth Sci* **4**: 1856.
- 926 90. Thijs S, Sillen W, Truyens S, Beckers B, van Hamme J, van Dillewijn P, *et al.*  
927 (2018). The Sycamore Maple Bacterial Culture Collection From a TNT Polluted Site  
928 Shows Novel Plant-Growth Promoting and Explosives Degrading Bacteria. *Frontiers in*  
929 *Plant Science* **9**: 136.
- 930 91. Liu J, Liu S, Sun K, Sheng Y, Gu Y, Gao Y. (2014). Colonization on Root Surface by  
931 a Phenanthrene-Degrading Endophytic Bacterium and Its Application for Reducing  
932 Plant Phenanthrene Contamination. *PLoS ONE* **9**: e108249.
- 933 92. Aydin S, Karaçay HA, Shahi A, Gökçe S, Ince B, Ince O. (2017). Aerobic and  
934 anaerobic fungal metabolism and Omics insights for increasing polycyclic aromatic  
935 hydrocarbons biodegradation. *Fungal Biology Reviews* **31**: 61–72.
- 936 93. Glassman SI, Levine CR, DiRocco AM, Battles JJ, Bruns TD. (2016).  
937 Ectomycorrhizal fungal spore bank recovery after a severe forest fire: some like it hot.  
938 *The ISME Journal* **10**: 1228–1239.
- 939 94. Peay KG, Garbelotto M, Bruns TD. (2009). Spore heat resistance plays an important  
940 role in disturbance-mediated assemblage shift of ectomycorrhizal fungi colonizing *Pinus*  
941 *muricata* seedlings. *J Ecol* **97**: 537–547.
- 942 95. Merino A, Fonturbel MT, Fernández C, Chávez-Vergara B, García-Oliva F, Vega JA.  
943 (2018). Inferring changes in soil organic matter in post-wildfire soil burn severity levels  
944 in a temperate climate. *Science of the Total Environment* **627**: 622-632.
- 945 96. McGee PA, Markovina A-L, Jeong GCE, Cooper ED. (2006). Trichocomaceae in  
946 bark survive high temperatures and fire. *FEMS Microbiology Ecology* **56**: 365–371.
- 947 97. Krug JC. (1995). The genus *Fimetariella*. *Canadian Journal of Botany-Revue*  
948 *Canadienne De Botanique* **73**: 1905–1916.

- 949 98. Eby SL, Anderson TM, Mayemba EP, Ritchie ME. (2014). The effect of fire on  
950 habitat selection of mammalian herbivores: the role of body size and vegetation  
951 characteristics. *Journal of Animal Ecology* **83**: 1196–1205.
- 952 99. Leverkus SER, Fuhlendorf SD, Geertsema M, Allred BW, Gregory M, Bevington AR,  
953 *et al.* (2018). Resource selection of free-ranging horses influenced by fire in northern  
954 Canada. *Human-Wildlife Interactions* **12**: 85–101.
- 955 100. Strong WL, Gates CC. (2009). Wood bison population recovery and forage  
956 availability in northwestern Canada. *Journal of Environmental Management* **90**: 434–  
957 440.
- 958 101. Tedersoo L, Bahram M, Polme S, Koljalg U, Yorou NS, Wijesundera R, *et al.*  
959 (2014). Global diversity and geography of soil fungi. *Science* **346**: 1256688–1256688.
- 960 102. Koukol O. (2009). Revision of ‘*Septonema ochraceum*’ revealed three new species  
961 of *Venturiaceae* and *Herpotrichiellaceae*. *Mycological Progress* **9**: 369–378.
- 962 103. Crous PW, Schubert K, Braun U, de Hoog GS, Hocking AD, Shin HD, *et al.* (2007).  
963 Opportunistic, human-pathogenic species in the *Herpotrichiellaceae* are phenotypically  
964 similar to saprobic or phytopathogenic species in the *Venturiaceae*. *Studies in Mycology*  
965 **58**: 185–217.
- 966 104. Weber R, Stenger E, Meffert A, Hahn M. (2004). Brefeldin A production by *Phoma*  
967 *medicaginis* in dead pre-colonized plant tissue: a strategy for habitat conquest?  
968 *Mycological Research* **108**: 662–671.
- 969

## 970 **Figure Legends**

971 **Figure 1.** Study region of northern Alberta and the Northwest Territories, Canada,  
972 including Wood Buffalo National Park (WBNP – grey outline). Blue points indicate  
973 sampled sites, orange shapes indicate sampled fires, and grey shapes indicate other  
974 2014 fires in the region. Inset indicates relative location within North America.

975

976 **Figure 2.** (A) NMDS ordination of Bray-Curtis distances between bacterial/archaeal  
977 (16S rRNA gene v4 region) communities for all samples ( $k=2$ , stress=0.16). Circles  
978 indicate burned plots, while triangles indicate unburned plots, and open points indicate  
979 open wetland sites. Points are shaded by pH, with darker colours indicating lower pH  
980 values. Grey points indicate samples for which pH values were not attainable, due to  
981 insufficient sample mass. (B) NMDS ordination of Bray-Curtis distances between fungal  
982 (ITS2) communities for all samples ( $k=3$ , stress=0.14). Circles indicate samples from  
983 burned plots, whereas triangles indicate unburned plots, and open points indicate open  
984 wetland sites. Points are shaded by C content, with darker colours indicating higher C.  
985 Note logged colour scale. Grey points indicate samples for which C values were not  
986 attainable, due to insufficient sample mass.

987

988 **Figure 3.** (A) Relationship between weighted mean predicted 16S rRNA gene copy  
989 number and burn severity index (BSI). Dashed line indicates linear fit ( $y = 2.19+0.16x$ ,  
990  $R^2_{adj}=0.20$ ,  $p<0.001$ ). (B) Bray-Curtis dissimilarity to unburned sites (within the same  
991 vegetation community and the same soil horizon type) for bacteria in uplands vs. burn  
992 severity index of comparison sites. Dashed lines indicate linear fit ( $y = 0.05x + 0.70$ ,  
993  $p<0.001$ ,  $R^2_{adj} = 0.22$ ). (C) Bray-Curtis dissimilarity to unburned sites (within the same  
994 vegetation community and the same soil horizon type) for fungi in uplands vs. burn  
995 severity index of comparison sites. Dashed lines indicate linear regressions ( $y = 0.02x$   
996  $+ 0.83$ ,  $p<0.001$ ,  $R^2_{adj} = 0.08$ ). For all figures, points are coloured by vegetation  
997 community; circles represent mineral horizon samples, triangles represent organic  
998 horizon samples. Equivalent figures for wetlands for (B) and (C) are found in  
999 Supplemental Figure 9.

1000



1001 **Figure 4.** Bacterial response to fire. (A) Log<sub>2</sub>-fold change in burned vs. unburned plots,  
1002 controlling for vegetation community, total C, and pH. Each point represents a single  
1003 16S rRNA gene v4 region OTU, and the size of each point represents the mean relative  
1004 abundance of that OTU across all samples. Faint points represent OTUs that were not  
1005 significantly different in abundance in burned vs. unburned plots. (B) Relative  
1006 abundance (note log scale) of selected fire-responsive bacterial OTUs across BSI  
1007 ranges (unburned=0, 0-2 low, 2-3 moderate, 3-4 high).

1008

1009 **Figure 5.** Fungal response to fire. (A) Log<sub>2</sub>-fold change in burned vs. unburned plots,  
1010 controlling for vegetation community, total C, and pH, arranged by class and coloured  
1011 by phylum. Each point represents a single ITS2 OTU, and the size of each point  
1012 represents the mean relative abundance of that OTU across all samples. Faint points  
1013 represent OTUs that were not significantly different in abundance in burned vs.  
1014 unburned plots. (B) Relative abundance (note log scale) of selected fire-responsive  
1015 fungal OTUs across BSI ranges (unburned=0, 0-2 low, 2-3 moderate, 3-4 high).

1016

1017 **Figure 6.** A) Co-occurrence network [16S and ITS2 - Organic and Mineral Horizons],  
1018 arranged into greedy clustering-defined modules. Each point represents an OTU. Points  
1019 are coloured by whether they were identified as being significantly more abundant in  
1020 burned samples (red) and those significantly less abundant in burned samples (light  
1021 blue) or no significant response (white). Lines between points indicate co-occurrences  
1022 (black) or co-exclusion (red). Module IDs are indicated with numbers for reference. B)  
1023 Module representation across moisture regimes: Fraction of total community  
1024 represented by all bacterial (top, 16S) and fungal (bottom, ITS2) OTUs within selected  
1025 modules, grouped by moisture regime, 2 being very dry, and 9 being very wet. C)  
1026 Module representation across pH values: Fraction of total community represented by all  
1027 bacterial (top, 16S) and fungal (bottom, ITS2) OTUs within selected modules grouped  
1028 by pH range.

1029

1030 **Figure 7.** Conceptual figure of hypothesized parallels between fire response strategies  
1031 for plants and microbes. Layered on top of these traits would be ecological interactions  
1032 between organisms in the post-fire community.

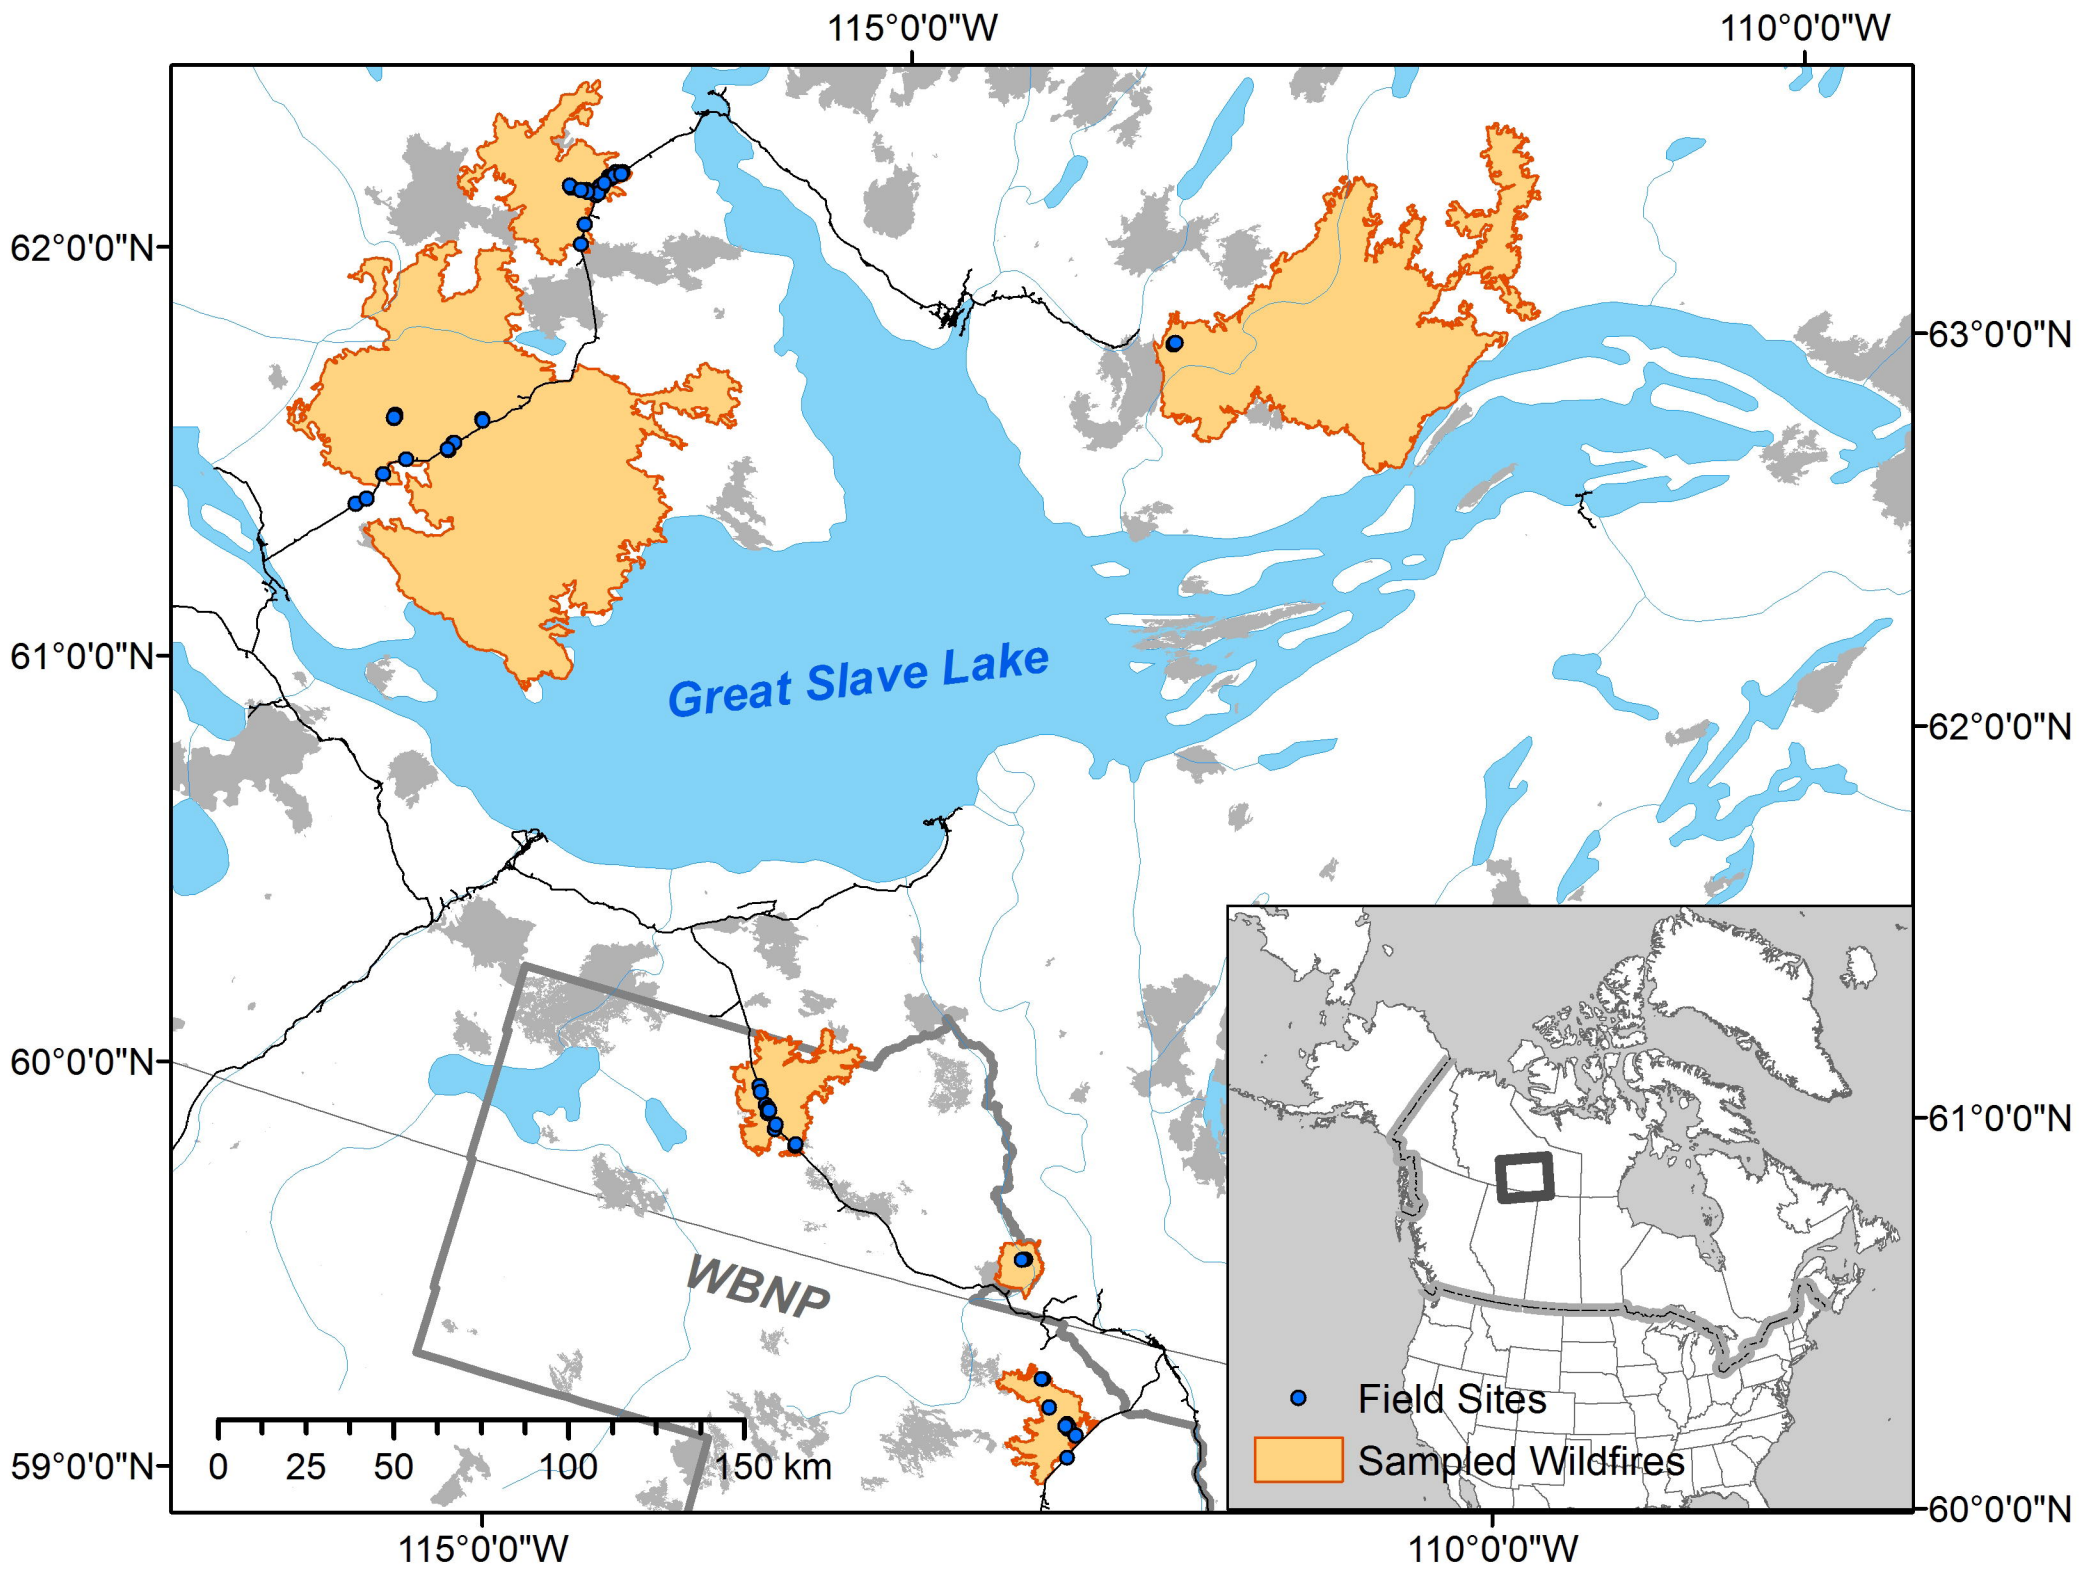

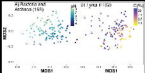

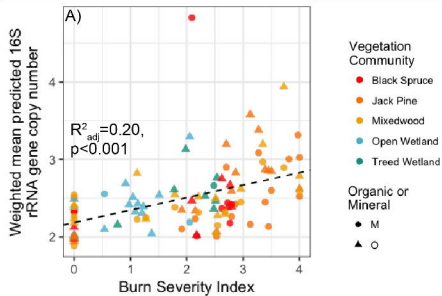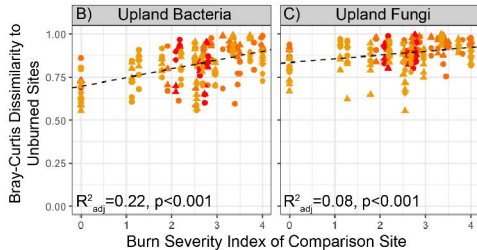

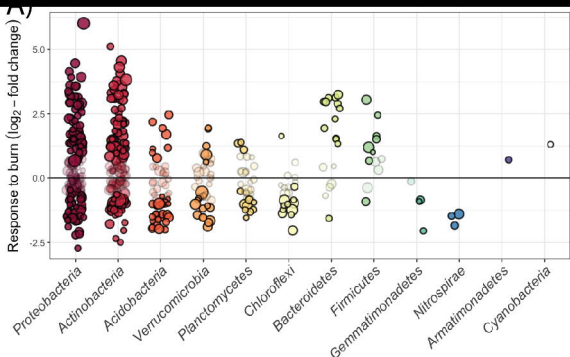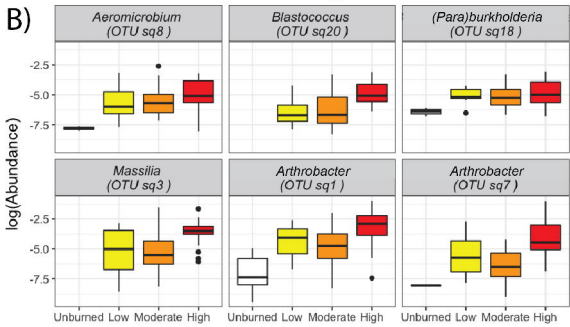

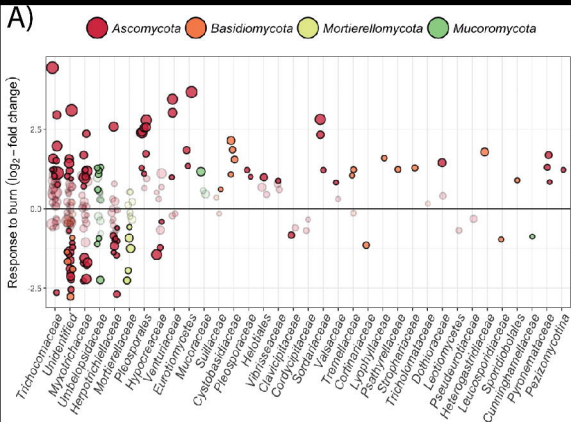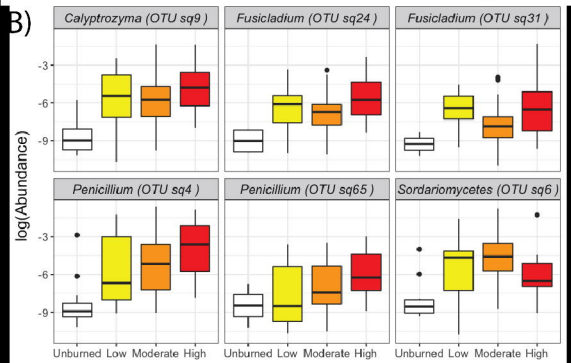

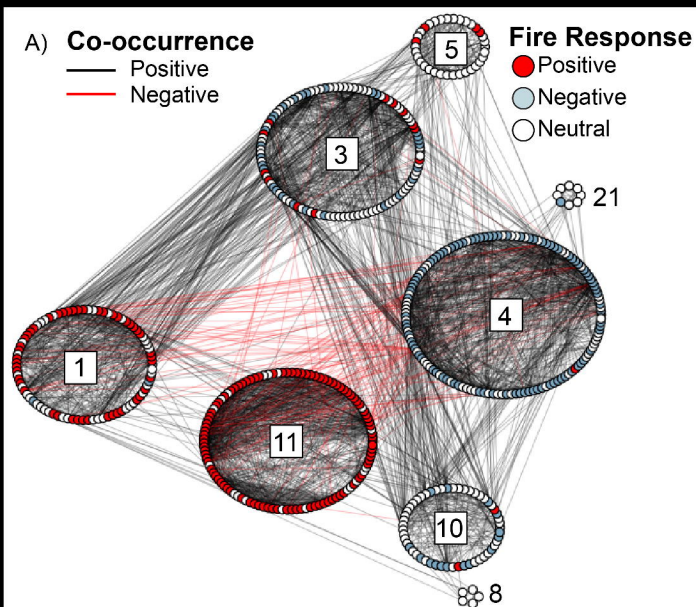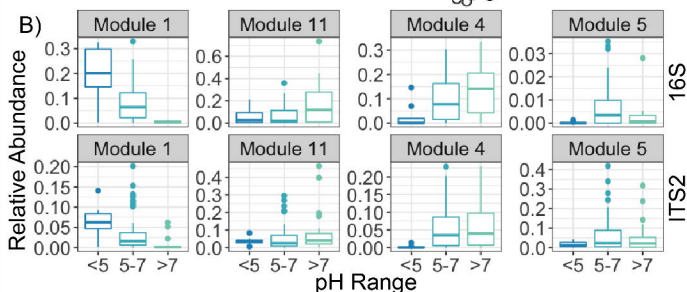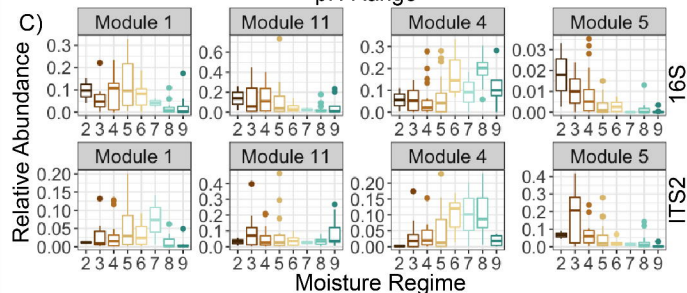



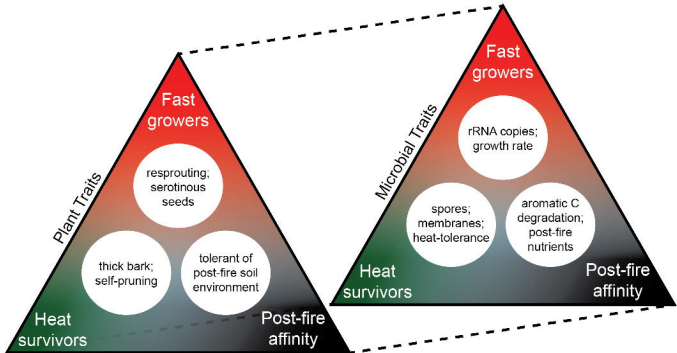

Source: https://www.biorxiv.org/content/10.1101/512798v1.full.pdf
